# Supplementary material for: Diffuse large B-cell lymphomas in adults with aberrant coexpression of CD10, BCL6, and MUM1 are enriched in IRF4 rearrangements
Source: PubMed Central journal article supplement — Blood Adv. 2022 Apr 7;6(7):2361–72. doi: 10.1182/bloodadvances.2021006034 (PMC9006278; doi:10.1182/bloodadvances.2021006034), 2022-04-07
Supplement: advancesADV2021006034-suppl1.pdf [file advancesADV2021006034-suppl1.pdf]

# **Supplemental material**

*Frauenfeld and Castrejon-de-Anta et al*

Supplemental Methods.....Page 3

Supplemental Tables.....Page 5

Supplemental Figures.....Page 45

Supplemental References.....Page 48

## **Gene expression profiling (GEP)**

### **Nanostring**

400ng (10µl at 40ng/µl) of total RNA from FFPE samples were processed using Gene Expression Lymph2Cx NanoString Assay. Samples were then incubated in a PCR machine, for 16 hours at 67°C. Next morning, on the deck of the NanoString nCounter Prep Station, purified Target/Probe complexes are eluted off and are immobilized in the cartridge for data collection on the nCounter Digital Analyzer. Digital images are processed on the nCounter Digital Analyzer and the barcode counts are tabulated in a comma separated value (CSV) format, which can be downloaded via a memory stick. Analysis was performed using nSolver 2.5 software.

### **HTG**

Next generation sequencing (NGS-)based gene expression profiling (GEP) was done to classify the DLBCL samples into GCB, ABC or unclassifiable subtypes using the HTG EdgeSeq System (HTG Molecular Diagnostics Inc., Tucson, AZ, USA). HTG gene expression data was generated using the HTG EdgeSeq DLBCL Cell of Origin Assay IT for Ion Torrent platform (Ion GeneStudio S5 prime, Thermo Fisher Scientific, Waltham, MA, USA). Starting material was tissue sections using 5 µm formalin-fixed paraffin embedded (FFPE) sections according to the manufactures protocol. Target capture, final libraries and semiconductor sequencing were performed with KAPA Library Quantification Kit, the Ion 510 & Ion 520 & Ion 530 Kit – Chef and the Ion 520 Chip Kit (Thermo Fisher Scientific, Waltham, MA, USA) according to the HTG recommendations, prepared for sequencing for Ion Torrent platform (F. Hoffman - La Roche AG, Basel/Kaiseraugst, Switzerland). The HTG EdgeSeq DLBCL panel measures the expression of 92 genes associated to B-cell lymphomas. The COO classification was performed using the HTG Edge System software (Version 5.5.823.5747). The HTG algorithm is trained to minimise the unclassifiable subgroup when compared with other methods <sup>1</sup>.

## **Mutational analysis - targeted Next Generation Sequencing**

### **SureSelectXT approach**

A total of 46 FFPE DNA samples were processed using SureSelectXT (Agilent Technologies, Santa Clara, CA) and using a panel design described in Supplemental Table 1. A total of 100ng of genomic DNA was sheared using the Covaris S220 focused-ultra sonicator (Covaris, Woburn, MA) to a target peak size of 150–200 bp. Library preparation were performed using SureSelectXT Custom Capture Library baits as described in SureSelectXT Target Enrichment System protocol (Agilent Technologies inc). For amplification of the post capture libraries, 10

to 13 cycles were performed depending on the initial sample quality. The libraries were qualified using the Bioanalyzer HS (Agilent Technologies inc.), quantified with the KAPA Library Quantification Kit (Kapa Biosystems, Wilmington, Massachusetts) and sequenced in a MiSeq instrument (Illumina, San Diego, CA) in a paired-end run of 150 bp. The average sequencing coverage of the 46 cases across regions was 873x (range 26-2693x).

FASTQ files were generated by MiSeq control software and quality control of the raw data was performed using the FastQC tool. Sequencing reads were subsequently aligned to the human reference genome (GRCh37/hg19) using the Burrows-Wheeler Aligner–MEM algorithm<sup>2</sup> Variant calling was performed using two different variant callers, Somatic Variant Caller (Illumina inc.) and Mutect2 (Genome Analysis Toolkit-GATK version 4.0.3)<sup>3</sup> and annotated using the VariantStudio software v3.0 and ANNOVAR, respectively.<sup>4</sup> Quality calls were excluded. For Mutect2 variants, low quality variants were also excluded using FilterMutectCalls (GATK) with default thresholds. We excluded non-interrogated variants (non-exonic) and known polymorphisms described in the GenomeAD, 1000Genomes and/or ExAC database (release 2015) with more than 1% frequency and synonymous variants. Finally, each variant was also visually inspected with the Integrative Genomics Viewer (IGV, Broad Institute, version 2.3) software to exclude artifacts.

### **AmpliSeq approach**

Targeted mutation analysis was performed by Next Generation Sequencing (Ion GeneStudio S5 prime, Thermo Fisher Scientific) using an AmpliSeq Custom Panel designed for DLBCLs (Supplemental Table 2). Amplicon library preparation and semiconductor sequencing was done according to the manufacturers' manuals using the Ion AmpliSeq Library Kit v2.0, the Ion Library TaqMan Quantitation Kit, the Ion 510 & Ion 520 & Ion 530 Kit – Chef, the Ion 520 Chip Kit and the Ion 530 Chip Kit (Thermo Fisher Scientific) as described before.<sup>5</sup>

Variant calling of non-synonymous somatic variants compared to the human reference sequence was performed using Ion Reporter Software (Thermo Fisher Scientific, Version 5.10.1 to Version 5.16.0.2). Variants were filtered with a threshold allele frequency of 5%. Variants called by the Ion Reporter Software were visualized using the Integrative Genomics Viewer (IGV; Broad Institute, Cambridge, MA; Version 2.8.0) to exclude panel-specific artefacts.

### **Prediction of mutation effect**

Since no germline DNA was available and in order to select somatic variants, potential driver mutations were predicted according to previously published criteria in which the 90% of the

mutations classified as functional were demonstrated to be somatic.<sup>6</sup> Inclusion criteria were: 1) any variant described previously as somatic or functional on previous reports or COSMIC, 2) all truncating variants (nonsense, frameshift, splice donor or acceptor mutations; and 3) the remaining missense variants that were predicted to be functionally deleterious using Mutation Assessor<sup>7</sup> or SIFT predictor (<http://sift.jcvi.org/>) if a definitive score was not provided by Mutation Assessor.<sup>8</sup>

### DNA copy number (CN) alterations analysis

CN regions of alteration with minimum size of 100 kb and CNN-LOH larger than 5 Mb were considered informative. Physiological deletions of the immunoglobulin loci were excluded from the analysis (Supplemental Table 7).

### Statistical methods

Differences in the distribution of individual parameters among patient subsets were analyzed by Fisher's exact test for categorized variables, and the Student's t-test for continuous variables (Supplemental Methods). Only mutations and genomic aberrations present in 5% of the cases and affecting a minimum of four cases were accounted for comparisons. The *P*-values for multiple comparisons were adjusted using the Benjamini–Hochberg correction (false discovery rate, FDR). A cut-off of *P*=.05 was considered significant. Statistical analyses were performed using R software v3.5.0.

Survival probabilities were estimated with the Kaplan–Meier method and differences assessed by the log-rank test. Event free survival (EFS) was calculated as previously described.<sup>24</sup>

**Supplemental Table 1. SureSelectXT 66 genes for the analysis of DLBCL**

| Gene Symbol   | Transcript  | Interval <sup>1</sup>     | Exons and flanking regions <sup>2</sup> | Pathway                      | Total Size (bp) |
|---------------|-------------|---------------------------|-----------------------------------------|------------------------------|-----------------|
| <b>ACTB</b>   | NM_001101.3 | chr7:5567379-5569288      | All CDS E2-6                            |                              | 1128            |
| <b>ARID1A</b> | NM_006015.4 | chr1:27022895-27107247    | All CDS E1-20                           | Epigenome/Chromatin modifier | 6858            |
| <b>ATM</b>    | NM_000051.3 | chr11:108098352-108236235 | All CDS E2-63                           |                              | 9171            |
| <b>B2M</b>    | NM_004048.2 | chr15:45003745--45008540  | All CDS E1-3                            | Immune Response              | 360             |
| <b>BCL10</b>  | NM_003921.4 | chr1:85733310-85742035    | All CDS E1-3                            | NFκB pathway                 | 702             |
| <b>BCL2</b>   | NM_000633.2 | chr18:60795858-60985899   | All CDS E1-2                            |                              | 720             |
| <b>BCL6</b>   | NM_001706.4 | chr3:187440245-187451481  | All CDS E3-10                           | B-cell differentiation       | 2129            |
| <b>BRAF</b>   | NM_004333.4 | chr7:140453075-140481493  | E11-15                                  | MAP-kinase pathway           | 546             |
| <b>BTG1</b>   | NM_001731.2 | chr12:92537856-92539311   | All CDS E1-2                            |                              | 516             |

|                 |                |                           |                    |                              |       |
|-----------------|----------------|---------------------------|--------------------|------------------------------|-------|
| <b>BTG2</b>     | NM_006763.2    | chr1:203274735-203276566  | All CDS E1-2       |                              | 477   |
| <b>BTK</b>      | NM_000061.2    | chrX:100604873-100630272  | All CDS E2-19      | NFkB pathway                 | 1980  |
| <b>CARD11</b>   | NM_032415.4    | chr7:2946272-2998140      | All CDS E2-25      | NFkB pathway                 | 3465  |
| <b>CCND3</b>    | NM_001760.3    | chr6:41903678-41909387    | All CDS E1-5       |                              | 879   |
| <b>CD58</b>     | NM_001779.2    | chr1:117057435-117113594  | All CDS E1-6       | Immune Response              | 753   |
| <b>CD70</b>     | NM_001252.3    | chr19:6586031-6591013     | All CDS E1-3       |                              | 582   |
| <b>CD79A</b>    | NM_001783.3    | chr19:42381375-42385047   | All CDS E1-5       | NFkB pathway                 | 681   |
| <b>CD79B</b>    | NM_001039933.2 | chr17:62006585-62009621   | All CDS E1-6       | NFkB pathway                 | 699   |
| <b>CIITA</b>    | NM_000246.3    | chr16:10971188-11017160   | All CDS E1-19      | Immune Response              | 3393  |
| <b>CREBBP</b>   | NM_004380.2    | chr16:3777719-3929917     | All CDS E1-31      | Epigenome/Chromatin modifier | 7329  |
| <b>DDX3X</b>    | NM_001356.3    | chrX:41193506-41206972    | All CDS E1-17      |                              | 1989  |
| <b>DIS3</b>     | NM_014953.3    | chr13:73333933-73355970   | All CDS E1-21      |                              | 2877  |
| <b>EP300</b>    | NM_001429.3    | chr22:41489009-41574960   | All CDS E1-31      | Epigenome/Chromatin modifier | 7245  |
| <b>ETS1</b>     | NM_001143820.1 | chr11:128332256-128443025 | All CDS E2-10      | MAP-kinase pathway           | 1458  |
| <b>ETV6</b>     | NM_001987.4    | chr12:11803062-12043980   | All CDS E1-8       |                              | 1359  |
| <b>EZH2</b>     | NM_004456.4    | chr7:148504738-148508812  | E16-20             | Epigenome/Chromatin modifier | 405   |
| <b>FBXW7</b>    | NM_033632.3    | chr4:153244033-153332955  | All CDS E2-12      | NOTCH pathway                | 2124  |
| <b>FOXO1</b>    | NM_002015.3    | chr13:41133660-41240349   | All CDS E1-2       |                              | 1968  |
| <b>GNA13</b>    | NM_006572.4    | chr17:63010375-63052711   | All CDC E1-4       | PI3K-AKT-mTOR pathway        | 1134  |
| <b>HIST1H1D</b> | NM_005320.2    | chr6:26234496-26235161    | All CDS E1         | Epigenome/Chromatin modifier | 666   |
| <b>HIST1H1E</b> | NM_005321.2    | chr6:26156619-26157278    | All CDS E1         | Epigenome/Chromatin modifier | 660   |
| <b>ID3</b>      | NM_002167.4    | chr1:23885451-23885917    | All CDS E1-2       | PI3K-AKT-mTOR pathway        | 360   |
| <b>IRF4</b>     | NM_002460.3    | chr6:393153-407598        | All CDS E2-9       | B-cell differentiation       | 1356  |
| <b>IRF8</b>     | NM_002163.2    | chr16:85936622-85954888   | All CDS E2-9       | B-cell differentiation       | 1281  |
| <b>KLHL6</b>    | NM_130446.2    | chr3:183209715-183273441  | All CDS E1-7       |                              | 1866  |
| <b>KMT2D</b>    | NM_003482.3    | chr12:49415563-49449107   | All CDS E1-54      | Epigenome/Chromatin modifier | 16614 |
| <b>KRAS</b>     | NM_033360.2    | chr12:25368375-25398318   | All CDS E2-5       | MAP-kinase pathway           | 570   |
| <b>MAP2K1</b>   | NM_002755.3    | chr15:66679686-66782953   | All CDS E1-11      | MAP-kinase pathway           | 1182  |
| <b>MAPK1</b>    | NM_002745.4    | chr22:22123493-22221730   | All CDS E1-8       | MAP-kinase pathway           | 1083  |
| <b>MEF2B</b>    | NM_001145785.1 | chr19:19256606-19261544   | All CDS E2-9       | Epigenome/Chromatin modifier | 1107  |
| <b>MYC</b>      | NM_002467.4    | chr8:128748840-128753674  | All CDS E1-3       | Cell cycle                   | 2989  |
| <b>MYD88</b>    | NM_002468.4    | chr3:38180153-38182777    | All CDS E1-5       | NFkB pathway                 | 930   |
| <b>NFKBIE</b>   | NM_004556.2    | chr6:44226956-44233500    | All CDS E1-6       | NFkB pathway                 | 1503  |
| <b>NOTCH1</b>   | NM_017617.3    | chr9:139390023-139399556  | E26-27, 34 + 3'UTR | NOTCH pathway                | 2568  |

|                 |                |                          |               |                              |      |
|-----------------|----------------|--------------------------|---------------|------------------------------|------|
| <b>NOTCH2</b>   | NM_024408.3    | chr1:120457929-120459317 | E34           | NOTCH pathway                | 1389 |
| <b>NRAS</b>     | NM_002524.4    | chr1:115251156-115258781 | All CDS E2-5  | MAP-kinase pathway           | 570  |
| <b>PCBP1</b>    | NM_006196      | chr2:70314876-70315946   | All CDS E1    |                              | 1071 |
| <b>PIK3CD</b>   | NM_005026.3    | chr1:9770513-9787104     | All CDS E3-24 | PI3K-AKT-mTOR pathway        | 3157 |
| <b>PIM1</b>     | NM_001243186.1 | chr6:37138079-37141867   | All CDS E1-6  |                              | 1214 |
| <b>POU2F2</b>   | NM_001207025.2 | chr19:42595704-42636563  | All CDS E1-14 |                              | 1392 |
| <b>PRDM1</b>    | NM_001198.3    | chr6:106534429-106555361 | All CDS E1-7  | B-cell differentiation       | 2478 |
| <b>PRKCB</b>    | NM_002738.6    | chr16:23847497-24226137  | All CDS E1-17 |                              | 2022 |
| <b>SETD2</b>    | NM_014159.6    | chr3:47058583-47205414   | All CDS E1-21 |                              | 7695 |
| <b>SGK1</b>     | NM_001143676.1 | chr6:134491406-134638598 | All CDS E1-14 | NOTCH pathway                | 1581 |
| <b>SMARCA4</b>  | NM_001128844.1 | chr19:11132400-11144541  | E20-28        |                              | 1266 |
| <b>SOCS1</b>    | NM_003745.1    | chr16:11348699-11349335  | All CDS E2    | JAK-STAT pathway             | 637  |
| <b>STAT3</b>    | NM_139276.2    | chr17:40467763-40500534  | All CDS E2-24 | JAK-STAT pathway             | 2313 |
| <b>STAT6</b>    | NM_001178078.1 | chr12:57490355-57502061  | All CDS E2-22 | JAK-STAT pathway             | 2544 |
| <b>TBL1XR1</b>  | NM_024665.4    | chr3:176743285-176782765 | All CDS E3-16 |                              | 1559 |
| <b>TCF3</b>     | NM_003200.3    | chr19:1611706-1650247    | All CDS E2-19 | PI3K-AKT-mTOR pathway        | 1965 |
| <b>TET2</b>     | NM_001127208.2 | chr4:106155099-106197676 | All CDS E3-11 | Epigenome/Chromatin modifier | 6018 |
| <b>TMEM30A</b>  | NM_018247.3    | chr6:75965818-75994354   | All CDS E1-7  |                              | 1086 |
| <b>TNFAIP3</b>  | NM_006290.3    | chr6:138192365-138202456 | All CDS E2-9  | NFkB pathway                 | 2373 |
| <b>TNFRSF14</b> | NM_003820.2    | chr1:2488104-2494712     | All CDS E1-8  |                              | 852  |
| <b>TNIP1</b>    | NM_001252390.1 | chr5:150410274-150444656 | All CDS E2-18 |                              | 1911 |
| <b>TP53</b>     | NM_000546.5    | chr17:7572927-7579912    | All CDS E2-11 | Cell cycle                   | 1182 |
| <b>XBP1</b>     | NM_005080      | chr22:29191534-29196512  | All CDS E1-5  | B-cell differentiation       | 786  |

CDS: coding sequence; E: exons

**Supplemental Table 2.** AmpliSeq Custom Panel used for the analysis of DLBCL.

|                | Transcript   | Position (GRCh37/hg19)              | Exon(s) | Amplicons* | Coverage of CDS (%) |
|----------------|--------------|-------------------------------------|---------|------------|---------------------|
| <b>EZH2</b>    | NM_004456    | chr7:148,508,712 – chr7:148,508,789 | 16      | 1          | -                   |
| <b>CD79B</b>   | NM_001039933 | chr17:62,006,789 - chr17:62,006,840 | 5       | 1          | -                   |
| <b>CD79B</b>   |              | chr17:62,006,586 - chr17:62,006,654 | 6       | 1          | -                   |
| <b>MYD88</b>   | NM_002468    | chr3:38,181,874 – chr3:38,182,064   | 3       | 4          | -                   |
| <b>MYD88</b>   |              | chr3:38,182,243 – chr3:38,182,344   | 4       | 2          | -                   |
| <b>MYD88</b>   |              | chr3:38,182,618 – chr3:38,182,726   | 5       | 2          | -                   |
| <b>CARD11</b>  | NM_032415    | chr7:2,946,272 - chr7:2,998,140     | CDS     | 54         | 95,30               |
| <b>IRF4</b>    | NM_002460    | chr6:393,153 – chr6:407,598         | CDS     | 18         | 95,61               |
| <b>BCL2</b>    | NM_000633    | chr18:60,795,858 - chr18:60,985,899 | CDS     | 9          | 95,86               |
| <b>TNFAIP3</b> | NM_006290    | chr6:138,192,365 – chr6:138,202,456 | CDS     | 29         | 96,49               |
| <b>PRDM1</b>   | NM_001198    | chr6:106,534,429 – chr6:106,555,361 | CDS     | 29         | 91,66               |
| <b>BCL6</b>    | NM_001706    | chr3:187,440,246 - chr3:187,451,481 | CDS     | 27         | 92,14               |
| <b>PIM1</b>    | NM_001243186 | chr6:37,138,079 – chr6:37,141,867   | CDS     | 16         | 90,98               |

\*The amplicon lengths range between 125-175 bp;CDS: coding sequence.

coverage of the panel in total: 94,23%

amplicons in total: 193

amplicons pool 1: 98

amplicons pool 2: 95



**Supplemental Table 3. Clinical data of 55 of diffuse large B-cell lymphomas with aberrant co-expression of CD10, BCL6 and MUM1**

| Case # | Sex | Age | Localization                  | Clinical stage | IPI        | Treatment                      | R/R | Follow-up     |
|--------|-----|-----|-------------------------------|----------------|------------|--------------------------------|-----|---------------|
| 1      | M   | 63  | cervical LN                   | III            | low-inter  | 6x R-CLIP + RTX                | No  | 36 mo<br>NED  |
| 2§     | M   | 67  | testis                        | IV             | high       | 4x R-CHOP+<br>4x R-MTX+<br>RTX | yes | 19 mo<br>LFU* |
| 4      | F   | 80  | cervical LN                   | NA             | NA         | N/A                            | NA  | NA            |
| 5§     | F   | 37  | submandibular LN              | I              | low        | 6x R-CHOP+<br>2x R             | No  | 49 mo<br>NED  |
| 6      | F   | 75  | nose/<br>Waldeyer ring        | IV             | NA         | 6x R-CHOP+<br>2x MTX           | No  | 44 mo<br>NED  |
| 7      | F   | 59  | uterine tumor                 | II             | low-inter  | 6x R-CHOP+<br>2x R             | No  | 32 mo<br>NED  |
| 8      | F   | 71  | colon                         | IE             | low        | 6x R-CHOP +<br>2x R            | Yes | 4 mo<br>DOD   |
| 9      | M   | 70  | cervical LN                   | I              | NA         | 6x R-CHOP +<br>2x R            | Yes | 12 mo<br>LFU  |
| 10§    | F   | 37  | tonsil                        | I              | low        | 6x R-CHOP<br>2x R              | No  | 32 mo<br>NED  |
| 11§    | F   | 67  | retroperitoneal mass          | IV             | high       | 6x R-CHOP<br>2x R              | No  | 25 mo<br>NED  |
| 12     | F   | 44  | breast                        | IE             | low        | 6x R-CHOP+RTX                  | No  | 62 mo<br>NED  |
| 13     | M   | 71  | testis                        | NA             | NA         | 4x HD-AraC,                    | Yes | 21 mo<br>DOD  |
| 14     | F   | 72  | breast                        | NA             | low        | 6x R-CHOP+RTX                  | Yes | 12 mo<br>LFU  |
| 15     | M   | 84  | upper eyelid                  | NA             | NA         | NA                             | NA  | NA            |
| 16§    | M   | 62  | inguinal LN                   | III            | low        | 6x R-CHOP<br>6x R              | No  | 76 mo<br>NED  |
| 17     | M   | 86  | oral mucosa/<br>Waldeyer ring | IV             | high-inter | 6x R-miniCHOP+<br>2x R         | No  | 7 mo<br>LFU   |
| 20     | M   | 77  | tonsil                        | NA             | NA         | NA                             | NA  | NA            |
| 21     | F   | 78  | ileum                         | II             | NA         | Hemicolectomy                  | NA  | LFU           |
| 22     | F   | 77  | LN                            | I              | low        | NA                             | NA  | 16 mo<br>LFU  |
| 23     | F   | 63  | stomach -colon<br>-pancreas   | IV             | high-inter | 5x R-CHOP+<br>3x R             | Yes | 12 mo<br>DOD  |
| 25§    | M   | 49  | abdominal LN                  | III            | low-inter  | 6x R-CHOP                      | No  | 58 mo<br>NED  |
| 26§    | F   | 55  | mesenteric LN                 | II             | low        | 6x R-CHOP                      | No  | 56 mo<br>NED  |

|     |   |    |                                   |     |            |                                                |     |                     |
|-----|---|----|-----------------------------------|-----|------------|------------------------------------------------|-----|---------------------|
| 27  | F | 49 | inguinal LN                       | IV  | high-inter | 6x R-CHOP                                      | No  | 57 mo NED           |
| 31§ | F | 79 | stomach                           | IV  | high       | 1x R-CHOP                                      | NA  | 1 mo LFU            |
| 32  | M | 55 | submandibular LN                  | II  | low        | 6x R-CHOP                                      | No  | 40 mo NED           |
| 33  | F | 54 | stomach                           | IV  | low-inter  | BURKIMAB                                       | No  | 39 mo post ASCT NED |
| 34  | F | 65 | axillar LN                        | IV  | N/A        | 6x R-CHOP                                      | Yes | 36 mo NED           |
| 35  | M | 47 | mediastinal mass                  | II  | low        | 6x R-CHOP + RTX                                | No  | 26 mo NED           |
| 38§ | F | 78 | pre-aortic LN                     | IV  | high       | 1x R-CHOP                                      | Yes | 5 mo DOD            |
| 39  | M | 81 | inguinal LN                       | IV  | high       | 6x R-CHOP                                      | Yes | 8 mo DOD            |
| 40  | M | 38 | cavum nasi/<br>Waldeyer ring      | I   | low        | 6x R-CHOP                                      | No  | 25 mo NED           |
| 41  | M | 72 | cervical LN                       | IV  | low-inter  | 6x R-CHOP                                      | No  | 23 mo NED           |
| 44§ | F | 38 | tonsil                            | NA  | NA         | 6x R-CHOP+RTX                                  | No  | 23 mo NED           |
| 45  | M | 45 | thigh                             | II  | low-inter  | 6x R-CHOP                                      | Yes | 19 mo DOD           |
| 46  | F | 59 | liver                             | IV  | low-inter  | 6x R-CHOP + MTX                                | No  | 16 mo NED           |
| 47  | F | 71 | paraortic LN                      | I   | low-inter  | 6x R-CHOP                                      | No  | 44 mo NED           |
| 48  | F | 78 | spleen                            | I   | low-inter  | 6x R-CHOP                                      | No  | 17 mo NED           |
| 49  | F | 70 | cervical LN                       | NA  | NA         | 6x R-CHOP                                      | No  | 7 mo NED            |
| 50  | F | 66 | bone marrow                       | IV  | high       | BURKIMAB                                       | Yes | 7mo DOD             |
| 51  | M | 72 | Ethmoidal sinus/<br>Waldeyer ring | IV  | high-inter | 4x R-CHOP                                      | No  | 6 mo DOC            |
| 52  | M | 63 | abdominal wall mass               | IV  | low-inter  | RTX, R-CEOP                                    | No  | 14 mo LFU           |
| 54  | M | 61 | left 8th rib                      | I   | Low        | 3x R-CHOP                                      | No  | 43 mo NED           |
| 57  | M | 70 | testis                            | NA  | NA         | NA                                             | NA  | NA                  |
| 58  | F | 92 | LN                                | NA  | NA         | NA                                             | NA  | NA                  |
| 60  | F | 64 | left hip tissue                   | IV  | low-inter  | 6x R-EPOCH                                     | No  | 24 mo NED           |
| 61  | M | 87 | paraspinal mass                   | III | high       | 6x R-CHOP+RTX                                  | NO  | NA                  |
| 62  | F | 74 | mesenteric LN                     | IV  | high       | 6x R-EPOCH                                     | No  | 18 mo NED           |
| 64  | F | 69 | bone marrow                       | IV  | high-inter | 6x R-EPOCH                                     | No  | 21 mo NED           |
| 65  | F | 76 | retroperitoneal mass              | NA  | NA         | NA                                             | NA  | NA                  |
| 68  | F | 65 | cervical LN                       | I   | low        | 6x R-CHOP                                      | No  | 12 mo NED           |
| 70§ | M | 75 | stomach**                         | IE  | -          | FOLFIRI,<br>Herceptin and 5-FU;<br>gastrectomy | No  | 42 mo NED           |

|     |   |    |                          |     |      |                    |    |              |
|-----|---|----|--------------------------|-----|------|--------------------|----|--------------|
| 71§ | F | 78 | tonsil                   | II  | low  | 4x R-CHOP          | No | 97 mo<br>NED |
| 72  | M | 61 | tonsil/<br>Waldeyer ring | IV  | NA   | 6x R-CHOP+<br>2x R | No | 9 mo<br>NED  |
| 73  | F | 87 | tonsil                   | IV  | NA   | No treatment       | -  | 1 mo<br>DOD  |
| 74§ | F | 85 | inguinal LN              | III | high | 2x R-Benda         | NA | 6 mo<br>DOD  |

M: male; F: female; IPI: International prognostic index; NA: not available; mo:months; LN: lymph node; LFU: lost to follow-up;

R/R: relapse/refractory; NED: no evidence of disease; DOD: died of disease; DOC: died of other cause; R: Rituximab;

R-CLIP: Rituximab-Cyclophosphamide, liposomal Vincristine, Prednisone; RTX: radiotherapy; R-CHOP: Rituximab-Cyclophosphamide, Doxorubicin, Vincristine, Prednisone; MTX: Methotrexate; BURKIMAB: Rituximab, Cyclophosphamide, Etoposide, Dexamethasone, Methotrexate, Iphosphamide, Vincristine, Cytarabine; R-EPOCH: Rituximab, Etoposide, Prednisone, Vincristine, Cyclophosphamide, Doxorubicin; SCT: stem cell transplantation; FOLFIRI: 5-Fluorouracil, Leucovorin and Irinotecan; 5-FU: 5-Fluorouracil.

§ Cases with *IRF4* translocation/mutation

\* lost to follow-up after SCT.

\*\* Concomitant diagnosis of gastric adenocarcinoma.

**Supplemental Table 4.** FISH results and COO in 55 cases diffuse large B-cell lymphoma with aberrant co-expression of CD10, BCL6 and MUM1

| Case | MYC<br>FISH | BCL2<br>FISH | BCL6<br>FISH | IRF4<br>FISH | IGH<br>FISH | light<br>chain<br>FISH | Nanostring<br>COO | HTG<br>COO     | COO final      | FISH Group |
|------|-------------|--------------|--------------|--------------|-------------|------------------------|-------------------|----------------|----------------|------------|
| 1    | N           | N            | G            | N            | G           |                        | GCB               | GCB            | GCB            | 1          |
| 2    | N           | N            | N            | N            | N           | IGK R                  | ABC               | ABC            | ABC            | 2          |
| 4    | N           | R            | N            | N            | R           |                        | unclassifiable    | GCB            | GCB            | 3          |
| 5    | N           | N            | N            | R            | N           | IGL R                  | GCB               | GCB            | GCB            | 2          |
| 6    | N           | N            | N            | N            | N           |                        | ABC               | ABC            | ABC            | 1          |
| 7    | N           | N            | N            | N            | N           |                        | NA                | GCB            | GCB            | 1          |
| 8    | N           | R            | R            | N            | R           |                        | NA                | GCB            | GCB            | 3          |
| 9    | N           | N            | G            | N            | N           |                        | ABC               | ABC            | ABC            | 1          |
| 10   | N           | N            | N            | R            | R           |                        | NA                | GCB            | GCB            | 2          |
| 11   | N           | N            | N            | R            | R           |                        | NA                | NA             | NA             | 2          |
| 12   | N           | N            | R            | N            | R           |                        | NA                | ABC            | ABC            | 3          |
| 13   | R           | N            | N            | N            | R           |                        | GCB               | GCB            | GCB            | 3          |
| 14   | N           | N            | N            | N            | N           |                        | unclassifiable    | ABC            | ABC            | 1          |
| 15   | N           | N            | N            | N            | N           |                        | GCB               | GCB            | GCB            | 1          |
| 16   | N           | N            | N            | R            | N           |                        | ABC               | ABC            | ABC            | 2          |
| 17   | N           | N            | N            | N            | R           |                        | ABC               | unclassifiable | ABC            | 3          |
| 20   | N           | N            | N            | N            | R           |                        | GCB               | GCB            | GCB            | 3          |
| 21   | N           | N            | G            | N            | N           |                        | unclassifiable    | ABC            | ABC            | 1          |
| 22   | N           | N            | N            | N            | N           |                        | unclassifiable    | GCB            | GCB            | 1          |
| 23   | R           | N            | N            | N            | N           |                        | NA                | GCB            | GCB            | 3          |
| 25   | N           | R            | N            | R            | R           |                        | unclassifiable    | NA             | unclassifiable | 3          |
| 26   | N           | R            | R            | R            | R           |                        | GCB               | NA             | GCB            | 3          |
| 27   | R           | N            | N            | N            | R           |                        | GCB               | NA             | GCB            | 3          |
| 31   | N           | N            | G            | R            | R           |                        | GCB               | NA             | GCB            | 2          |
| 32   | N           | N            | N            | N            | N           |                        | unclassifiable    | NA             | unclassifiable | NI         |
| 33   | R           | N            | N            | N            | N           |                        | GCB               | NA             | GCB            | 3          |
| 34   | N           | R            | N            | N            | R           |                        | ABC               | NA             | ABC            | 3          |
| 35   | R           | N            | N            | N            | NA          |                        | GCB               | NA             | GCB            | 3          |

|    |   |    |   |   |    |       |                |     |                |    |
|----|---|----|---|---|----|-------|----------------|-----|----------------|----|
| 38 | N | N  | N | N | N  | IGL R | ABC            | NA  | ABC            | 2  |
| 39 | N | N  | R | N | NA |       | ABC            | NA  | ABC            | 3  |
| 40 | N | G  | N | N | N  |       | GCB            | NA  | GCB            | 1  |
| 41 | G | N  | R | N | N  |       | GCB            | NA  | GCB            | 3  |
| 44 | N | N  | N | R | N  |       | GCB            | NA  | GCB            | 2  |
| 45 | R | N  | N | N | R  |       | GCB            | NA  | GCB            | 3  |
| 46 | N | N  | N | N | N  |       | GCB            | NA  | GCB            | NI |
| 47 | N | G  | G | N | R  |       | GCB            | NA  | GCB            | 3  |
| 48 | R | N  | R | N | N  |       | GCB            | NA  | GCB            | 3  |
| 49 | G | G  | G | N | N  |       | ABC            | NA  | ABC            | 1  |
| 50 | R | R  | R | G | R  |       | GCB            | NA  | GCB            | 3  |
| 51 | N | N  | G | N | N  |       | GCB            | NA  | GCB            | 1  |
| 52 | N | R  | R | N | R  |       | unclassifiable | NA  | unclassifiable | 3  |
| 54 | G | R  | G | G | R  |       | GCB            | NA  | GCB            | NI |
| 57 | G | G  | G | N | N  |       | GCB            | NA  | GCB            | 1  |
| 58 | N | R  | N | N | R  |       | GCB            | NA  | GCB            | NI |
| 60 | R | N  | N | G | R  |       | GCB            | NA  | GCB            | 3  |
| 61 | N | R  | N | N | R  |       | GCB            | NA  | GCB            | NI |
| 62 | R | R  | R | N | R  |       | unclassifiable | NA  | unclassifiable | 3  |
| 64 | R | N  | R | N | N  |       | unclassifiable | NA  | unclassifiable | 3  |
| 65 | N | R  | R | N | R  |       | GCB            | NA  | GCB            | 3  |
| 68 | N | NA | R | N | R  |       | unclassifiable | NA  | unclassifiable | 3  |
| 70 | N | N  | N | R | N  | IGL R | NA             | ABC | ABC            | 2  |
| 71 | N | N  | N | R | R  |       | GCB            | GCB | GCB            | 2  |
| 72 | N | N  | G | N | N  |       | unclassifiable | ABC | ABC            | 1  |
| 73 | N | N  | N | N | R  |       | ABC            | ABC | ABC            | 3  |
| 74 | N | N  | N | R | R  |       | ABC            | ABC | ABC            | 2  |

FISH: fluorescence *in situ* hybridization, N: normal, G: gains, R: rearranged, IGH: Immunoglobulin heavy chain, IGK: light chain kappa  
 IGL: Immunoglobulin light chain Lambda, NI: not included because of lack of mutational analysis; COO: cell of origin

**Supplemental Table 5.** List of mutations detected in 50 cases of diffuse large B-cell lymphoma with aberrant co-expression of CD10, BCL6 and MUM1

| Case | Gene            | Chr | Start     | VAF  | Function               | cDNA           | AA pos    | Verified<br>ampliseq | Filtre    | COSMICv<br>84_ID | SIFT_pred   | MutAssess_<br>pred |
|------|-----------------|-----|-----------|------|------------------------|----------------|-----------|----------------------|-----------|------------------|-------------|--------------------|
| 1    | <i>FBXW7</i>    | 4   | 153250883 | 50.7 | stopgain               | c.C1177T       | p.R393X   |                      | Driver    | COSM105<br>2102  | .           | .                  |
| 1    | <i>PIM1</i>     | 6   | 37138987  | 35   | nonsynonymous<br>SNV   | c.G600C        | p.W200C   |                      | Passenger | .                | Deleterious | Low                |
| 1    | <i>KMT2D</i>    | 12  | 49434153  | 34.4 | nonsynonymous<br>SNV   | c.A7400C       | p.H2467P  |                      | Passenger | .                | Tolerated   | Low                |
| 2    | <i>PIK3CD</i>   | 1   | 9784041   | 57.8 | nonsynonymous<br>SNV   | c.G2609A       | p.R870Q   |                      | Passenger | .                | Tolerated   | Low                |
| 2    | <i>BTG2</i>     | 1   | 203274858 | 37.4 | nonsynonymous<br>SNV   | c.C124T        | p.L42F    |                      | Driver    | COSM571<br>4747  | Deleterious | Medium             |
| 2    | <i>MYD88</i>    | 3   | 38182641  | 39.4 | nonsynonymous<br>SNV   | c.T794C        | p.L265P   | Verified             | Driver    | COSM859<br>40    | Deleterious | .                  |
| 2    | <i>IRF4</i>     | 6   | 393330    | 7.6  | stopgain               | c.C178T        | p.Q60X    | Verified             | Driver    | .                | .           | .                  |
| 2    | <i>HIST1H1E</i> | 6   | 26156965  | 36.9 | nonsynonymous<br>SNV   | c.C347T        | p.A116V   |                      | Passenger | .                | Tolerated   | Low                |
| 2    | <i>PIM1</i>     | 6   | 37138355  | 40   | nonsynonymous<br>SNV   | c.C277T        | p.L93F    | Verified             | Driver    | COSM220<br>745   | Deleterious | Neutral            |
| 2    | <i>PIM1</i>     | 6   | 37138603  | 23.8 | nonsynonymous<br>SNV   | c.G410A        | p.S137N   |                      | Passenger | .                | Tolerated   | Neutral            |
| 2    | <i>PIM1</i>     | 6   | 37139045  | 34.6 | nonsynonymous<br>SNV   | c.C658T        | p.L220F   |                      | Driver    | .                | Deleterious | Medium             |
| 2    | <i>PIM1</i>     | 6   | 37139063  | 34   | nonsynonymous<br>SNV   | c.G676C        | p.E226Q   |                      | Passenger | .                | Deleterious | Neutral            |
| 2    | <i>KMT2D</i>    | 12  | 49437149  | 33.1 | frameshift<br>deletion | c.5529_5530del | p.T1843fs |                      | Driver    | .                | .           | .                  |
| 2    | <i>CD79B</i>    | 17  | 62006798  | 34.3 | nonsynonymous<br>SNV   | c.A590G        | p.Y197C   | Verified             | Driver    | COSM220<br>736   | Deleterious | Neutral            |
| 4    | <i>BTG2</i>     | 1   | 203274742 | 17.1 | nonsynonymous<br>SNV   | c.A8G          | p.H3R     |                      | Passenger | .                | Tolerated   | Neutral            |
| 4    | <i>BTG2</i>     | 1   | 203274787 | 19   | nonsynonymous<br>SNV   | c.G53A         | p.G18D    |                      | Passenger | .                | Tolerated   | Low                |
| 4    | <i>SETD2</i>    | 3   | 47164351  | 45.4 | nonsynonymous<br>SNV   | c.C1775A       | p.T592K   |                      | Driver    | COSM634<br>0776  | Deleterious | Low                |
| 4    | <i>HIST1H1E</i> | 6   | 26156846  | 35   | nonsynonymous<br>SNV   | c.C228G        | p.N76K    |                      | Driver    | COSM392<br>7974  | Deleterious | Medium             |
| 4    | <i>PIM1</i>     | 6   | 37138355  | 19.3 | nonsynonymous<br>SNV   | c.C277T        | p.L93F    | Verified             | Driver    | COSM220<br>745   | Deleterious | Neutral            |

|   |                |    |           |      |                        |              |              |              |           |             |             |         |
|---|----------------|----|-----------|------|------------------------|--------------|--------------|--------------|-----------|-------------|-------------|---------|
| 4 | <i>ETS1</i>    | 11 | 128442971 | 36.1 | nonsynonymous SNV      | c.C55G       | p.R19G       |              | Driver    | .           | Deleterious | .       |
| 4 | <i>KMT2D</i>   | 12 | 49427027  | 57.9 | stopgain               | c.C11461T    | p.Q3821X     |              | Driver    | .           | .           | .       |
| 4 | <i>STAT6</i>   | 12 | 57496658  | 51.5 | nonsynonymous SNV      | c.A1259G     | p.N420S      |              | Driver    | COSM4170475 | Tolerated   | Low     |
| 4 | <i>STAT3</i>   | 17 | 40475325  | 51.9 | nonsynonymous SNV      | c.T1701A     | p.N567K      |              | Driver    | COSM220687  | Tolerated   | Neutral |
| 4 | <i>BCL2</i>    | 18 | 60985721  | 37.9 | nonsynonymous SNV      | c.C179T      | p.A60V       | Verified     | Driver    | COSM220803  | Tolerated   | Low     |
| 4 | <i>BCL2</i>    | 18 | 60985725  | 38.6 | nonsynonymous SNV      | c.C175T      | p.P59S       | Verified     | Driver    | COSM220823  | Tolerated   | Neutral |
| 4 | <i>BCL2</i>    | 18 | 60985833  | 26.8 | nonsynonymous SNV      | c.C67G       | p.L23V       | Not Verified | Driver    | .           | Deleterious | Medium  |
| 4 | <i>BCL2</i>    | 18 | 60985866  | 21   | nonsynonymous SNV      | c.C34T       | p.R12W       | Verified     | Driver    | COSM4170953 | Deleterious | Medium  |
| 4 | <i>BCL2</i>    | 18 | 60985878  | 18.2 | nonsynonymous SNV      | c.G22A       | p.G8R        | Verified     | Driver    | .           | Deleterious | Medium  |
| 5 | <i>IRF4</i>    | 6  | 393156    | 16.1 | nonsynonymous SNV      | c.A4G        | p.N2D        | Verified     | Passenger | .           | Deleterious | Low     |
| 5 | <i>IRF4</i>    | 6  | 393217    | 13.6 | nonsynonymous SNV      | c.G65T       | p.G22V       | Verified     | Passenger | .           | Tolerated   | Neutral |
| 5 | <i>IRF4</i>    | 6  | 393222    | 13.4 | nonsynonymous SNV      | c.C70T       | p.L24F       | Verified     | Driver    | COSM4171587 | Deleterious | Medium  |
| 5 | <i>IRF4</i>    | 6  | 393225    | 15.3 | nonsynonymous SNV      | c.C73A       | p.R25S       | Verified     | Driver    | .           | Deleterious | Medium  |
| 5 | <i>IRF4</i>    | 6  | 393341    | 15.9 | nonframeshift deletion | c.189_191del | p.63_64del   | Not Verified | Driver    | .           | .           | .       |
| 5 | <i>IRF4</i>    | 6  | 393349    | 14.3 | nonsynonymous SNV      | c.A197C      | p.E66A       | Not Verified | Passenger | .           | Tolerated   | Low     |
| 5 | <i>CARD11</i>  | 7  | 2983886   | 13   | nonsynonymous SNV      | c.A644C      | p.K215T      | Verified     | Driver    | COSM1089012 | Deleterious | Medium  |
| 5 | <i>KMT2D</i>   | 12 | 49427545  | 47.6 | nonsynonymous SNV      | c.C10943T    | p.P3648L     |              | Driver    | COSM1361992 | Deleterious | Neutral |
| 6 | <i>PIK3CD</i>  | 1  | 9776110   | 32.7 | nonframeshift deletion | c.574_579del | p.192_193del |              | Driver    | .           | .           | .       |
| 6 | <i>BTG2</i>    | 1  | 203274836 | 25.5 | nonsynonymous SNV      | c.G102T      | p.R34S       |              | Passenger | .           | Tolerated   | Neutral |
| 6 | <i>MYD88</i>   | 3  | 38182641  | 32.7 | nonsynonymous SNV      | c.T794C      | p.L265P      | Verified     | Driver    | COSM85940   | Deleterious | .       |
| 6 | <i>TBL1XR1</i> | 3  | 176750835 | 35.3 | nonsynonymous SNV      | c.G1340A     | p.S447N      |              | Driver    | COSM3205524 | Deleterious | Medium  |
| 6 | <i>PIM1</i>    | 6  | 37138916  | 28.7 | nonsynonymous SNV      | c.G529C      | p.V177L      | Verified     | Passenger | .           | Tolerated   | Low     |

|   |                 |    |           |      |                        |                |                |          |           |             |             |         |
|---|-----------------|----|-----------|------|------------------------|----------------|----------------|----------|-----------|-------------|-------------|---------|
| 6 | <i>PIM1</i>     | 6  | 37139153  | 21.8 | nonsynonymous SNV      | c.C766T        | p.H256Y        | Verified | Driver    | .           | Deleterious | Medium  |
| 6 | <i>PRDM1</i>    | 6  | 106536324 | 51   | nonsynonymous SNV      | c.G291C        | p.E97D         | Verified | Driver    | COSM97137   | Tolerated   | Low     |
| 6 | <i>KMT2D</i>    | 12 | 49420607  | 32.3 | nonsynonymous SNV      | c.C15142T      | p.R5048C       |          | Driver    | COSM1742335 | Deleterious | High    |
| 6 | <i>TP53</i>     | 17 | 7577106   | 33.5 | nonsynonymous SNV      | c.C832T        | p.P278S        |          | Driver    | COSM10939   | Deleterious | Medium  |
| 7 | <i>BTG2</i>     | 1  | 203274817 | 38.8 | nonsynonymous SNV      | c.G83A         | p.G28D         |          | Driver    | COSM5946364 | Tolerated   | Medium  |
| 7 | <i>BTG2</i>     | 1  | 203274831 | 38.9 | nonsynonymous SNV      | c.C97G         | p.Q33E         |          | Passenger | .           | Tolerated   | Neutral |
| 7 | <i>BTG2</i>     | 1  | 203274858 | 39.6 | nonsynonymous SNV      | c.C124G        | p.L42V         |          | Driver    | COSM5714925 | Deleterious | Medium  |
| 7 | <i>MYD88</i>    | 3  | 38182641  | 41.8 | nonsynonymous SNV      | c.T794C        | p.L265P        | Verified | Driver    | COSM85940   | Deleterious | .       |
| 7 | <i>KLHL6</i>    | 3  | 183273174 | 37.4 | nonsynonymous SNV      | c.C268G        | p.L90V         |          | Driver    | COSM4171225 | Deleterious | High    |
| 7 | <i>HIST1H1E</i> | 6  | 26156827  | 38.8 | nonsynonymous SNV      | c.G209A        | p.G70D         |          | Driver    | .           | Deleterious | Medium  |
| 7 | <i>PIM1</i>     | 6  | 37138423  | 60.6 | nonsynonymous SNV      | c.G345C        | p.K115N        | Verified | Driver    | COSM220742  | Tolerated   | Neutral |
| 7 | <i>KMT2D</i>    | 12 | 49434709  | 51.4 | nonsynonymous SNV      | c.C6844T       | p.R2282W       |          | Passenger | .           | Deleterious | Neutral |
| 7 | <i>BTG1</i>     | 12 | 92539173  | 26.9 | nonsynonymous SNV      | c.C139G        | p.L47V         |          | Passenger | .           | Tolerated   | Low     |
| 7 | <i>CREBBP</i>   | 16 | 3786773   | 33.4 | nonframeshift deletion | c.4436_4438del | p.1479_1480del |          | Driver    | .           | .           | .       |
| 7 | <i>CD79B</i>    | 17 | 62006798  | 44.2 | nonsynonymous SNV      | c.A590G        | p.Y197C        | Verified | Driver    | COSM220736  | Deleterious | Neutral |
| 8 | <i>ARID1A</i>   | 1  | 27023461  | 37.3 | frameshift insertion   | c.568dupG      | p.G189fs       |          | Driver    | .           | .           | .       |
| 8 | <i>TNIP1</i>    | 5  | 150415225 | 10.2 | nonframeshift deletion | c.1425_1439del | p.475_480del   |          | Driver    | .           | .           | .       |
| 8 | <i>PIM1</i>     | 6  | 37139018  | 15.8 | nonsynonymous SNV      | c.C631G        | p.L211V        | Verified | Driver    | COSM1581467 | Deleterious | Low     |
| 8 | <i>SGK1</i>     | 6  | 134492857 | 54.1 | nonsynonymous SNV      | c.A1085G       | p.E362G        |          | Driver    | .           | Deleterious | High    |
| 8 | <i>TNFAIP3</i>  | 6  | 138202351 | 56.5 | frameshift deletion    | c.2268delC     | p.D756fs       | Verified | Driver    | .           | .           | .       |
| 8 | <i>MYC</i>      | 8  | 128750802 | 18.4 | nonsynonymous SNV      | c.G339C        | p.Q113H        |          | Driver    | COSM1159800 | Deleterious | Medium  |



|    |          |    |           |      |                        |              |            |               |           |             |             |         |
|----|----------|----|-----------|------|------------------------|--------------|------------|---------------|-----------|-------------|-------------|---------|
| 8  | CREBBP   | 16 | 3777833   | 34.3 | nonsynonymous SNV      | c.G7215C     | p.Q2405H   |               | Passenger | .           | Deleterious | Low     |
| 8  | CREBBP   | 16 | 3786760   | 29.9 | nonsynonymous SNV      | c.T4451C     | p.F1484S   |               | Driver    | COSM4170754 | Deleterious | High    |
| 8  | STAT3    | 17 | 40475325  | 32.9 | nonsynonymous SNV      | c.T1701A     | p.N567K    |               | Driver    | COSM220687  | Tolerated   | Neutral |
| 8  | BCL2     | 18 | 60985878  | 24.9 | nonsynonymous SNV      | c.G22C       | p.G8R      | Verified      | Driver    | .           | Deleterious | Medium  |
| 9  | HIST1H1E | 6  | 26157150  | 76.5 | nonsynonymous SNV      | c.G532A      | p.A178T    |               | Driver    | COSM3860915 | Tolerated   | Low     |
| 9  | CCND3    | 6  | 41903707  | 52.9 | nonsynonymous SNV      | c.C850T      | p.P284S    |               | Driver    | COSM144647  | Deleterious | Medium  |
| 9  | ACTB     | 7  | 5569017   | 14   | nonframeshift deletion | c.127_138del | p.43_46del |               | Driver    | .           | .           | .       |
| 9  | SOCS1    | 16 | 11349032  | 37.8 | nonsynonymous SNV      | c.C304G      | p.L102V    |               | Driver    | .           | Deleterious | Medium  |
| 9  | SOCS1    | 16 | 11349260  | 34.8 | frameshift deletion    | c.76delT     | p.S26fs    |               | Driver    | .           | .           | .       |
| 10 | IRF4     | 6  | 393172    | 31   | nonsynonymous SNV      | c.G20T       | p.G7V      | Only Ampliseq | Passenger | .           | Tolerated   | Neutral |
| 10 | IRF4     | 6  | 393201    | 11   | nonsynonymous SNV      | c.G49C       | p.V17L     | Only Ampliseq | Passenger | .           | Tolerated   | Neutral |
| 10 | IRF4     | 6  | 393206    | 11   | nonsynonymous SNV      | c.C54A       | p.S18R     | Only Ampliseq | Passenger | .           | Deleterious | Low     |
| 10 | IRF4     | 6  | 393262    | 21   | nonsynonymous SNV      | c.A110T      | p.Y37F     | Only Ampliseq | Passenger | .           | Tolerated   | Low     |
| 10 | IRF4     | 6  | 393283    | 21   | nonsynonymous SNV      | c.A131G      | p.N44S     | Only Ampliseq | Passenger | .           | Deleterious | Low     |
| 10 | IRF4     | 6  | 393295    | 16   | nonsynonymous SNV      | c.G143C      | p.S48T     | Only Ampliseq | Passenger | .           | Tolerated   | Neutral |
| 10 | IRF4     | 6  | 393298    | 23   | nonsynonymous SNV      | c.T146C      | p.I49T     | Only Ampliseq | Passenger | .           | Deleterious | Low     |
| 10 | IRF4     | 6  | 393330    | 23   | nonsynonymous deletion | c.del178_180 | p.Q60F     | Only Ampliseq | Driver    | .           | .           | .       |
| 11 | ARID1A   | 1  | 27106307  | 3.66 | stopgain               | c.G5918A     | p.W1973X   |               | Driver    | COSM4808707 | .           | .       |
| 11 | BCL10    | 1  | 85736511  | 3.02 | frameshift deletion    | c.136delA    | p.I46fs    |               | Driver    | COSM391505  | .           | .       |
| 11 | SETD2    | 3  | 47162668  | 6.35 | nonsynonymous SNV      | c.T3458C     | p.I1153T   |               | Passenger | .           | Deleterious | Neutral |
| 11 | TET2     | 4  | 106156975 | 3.2  | stopgain               | c.C1876T     | p.Q626X    |               | Driver    | COSM211684  | .           | .       |

|    |                 |    |           |       |                        |                  |            |          |           |             |             |         |
|----|-----------------|----|-----------|-------|------------------------|------------------|------------|----------|-----------|-------------|-------------|---------|
| 11 | <i>IRF4</i>     | 6  | 393225    | 2.19  | frameshift deletion    | c.73_95del       | p.R25fs    | Verified | Driver    | .           | .           | .       |
| 11 | <i>HIST1H1E</i> | 6  | 26156985  | 5.52  | nonsynonymous SNV      | c.G367T          | p.A123S    |          | Driver    | .           | Tolerated   | Medium  |
| 11 | <i>HIST1H1E</i> | 6  | 26157012  | 3.42  | nonsynonymous SNV      | c.G394A          | p.A132T    |          | Driver    | .           | Tolerated   | Medium  |
| 11 | <i>HIST1H1E</i> | 6  | 26157099  | 2.58  | nonsynonymous SNV      | c.C481G          | p.P161A    |          | Driver    | COSM2857867 | Tolerated   | Medium  |
| 11 | <i>HIST1H1E</i> | 6  | 26157144  | 2.6   | nonsynonymous SNV      | c.G526C          | p.A176P    |          | Passenger | .           | Tolerated   | Low     |
| 11 | <i>HIST1H1E</i> | 6  | 26157150  | 76.14 | nonsynonymous SNV      | c.G532A          | p.A178T    |          | Driver    | COSM3860915 | Tolerated   | Low     |
| 11 | <i>HIST1H1E</i> | 6  | 26157204  | 3.53  | nonsynonymous SNV      | c.C586A          | p.P196T    |          | Driver    | COSM1292262 | Deleterious | Medium  |
| 11 | <i>PIM1</i>     | 6  | 37139021  | 3.43  | nonsynonymous SNV      | c.G634C          | p.E212Q    | Verified | Driver    | .           | Deleterious | Medium  |
| 11 | <i>CCND3</i>    | 6  | 41903707  | 45.09 | nonsynonymous SNV      | c.C850T          | p.P284S    |          | Driver    | COSM144647  | Deleterious | Medium  |
| 11 | <i>SGK1</i>     | 6  | 134495170 | 5.24  | nonsynonymous SNV      | c.G486C          | p.E162D    |          | Passenger | .           | Tolerated   | Low     |
| 11 | <i>ACTB</i>     | 7  | 5569017   | 15.35 | nonframeshift deletion | c.127_138del     | p.43_46del |          | Driver    | .           | .           | .       |
| 11 | <i>ACTB</i>     | 7  | 5569230   | 10.09 | nonsynonymous SNV      | c.G59C           | p.G20A     |          | Driver    | COSM3358151 | .           | High    |
| 11 | <i>MYC</i>      | 8  | 128750527 | 3.2   | nonsynonymous SNV      | c.T64C           | p.F22L     |          | Driver    | COSM3358205 | Tolerated   | Neutral |
| 11 | <i>KMT2D</i>    | 12 | 49439906  | 37.72 | frameshift deletion    | c.4619_4635del   | p.E1540fs  |          | Driver    | .           | .           | .       |
| 11 | <i>KMT2D</i>    | 12 | 49443634  | 2.16  | nonsynonymous SNV      | c.C3737T         | p.T1246M   |          | Driver    | COSM940079  | Deleterious | Neutral |
| 11 | <i>CREBBP</i>   | 16 | 3779138   | 17.59 | frameshift insertion   | c.5909_5910ins T | p.Q1970fs  |          | Driver    | .           | .           | .       |
| 11 | <i>SOCS1</i>    | 16 | 11348769  | 2.65  | nonsynonymous SNV      | c.G567C          | p.E189D    |          | Passenger | .           | Tolerated   | Low     |
| 11 | <i>SOCS1</i>    | 16 | 11348920  | 2.77  | nonsynonymous SNV      | c.G416A          | p.G139D    |          | Passenger | .           | Deleterious | Low     |
| 11 | <i>SOCS1</i>    | 16 | 11348951  | 2.49  | nonsynonymous SNV      | c.C385T          | p.H129Y    |          | Passenger | .           | Tolerated   | Neutral |
| 11 | <i>SOCS1</i>    | 16 | 11348962  | 4.51  | nonsynonymous SNV      | c.G374C          | p.S125T    |          | Driver    | COSM5947826 | Deleterious | Medium  |
| 11 | <i>SOCS1</i>    | 16 | 11348968  | 2.3   | nonsynonymous SNV      | c.C368A          | p.P123H    |          | Driver    | .           | Deleterious | Medium  |

|    |          |    |           |       |                      |             |           |               |           |             |             |         |
|----|----------|----|-----------|-------|----------------------|-------------|-----------|---------------|-----------|-------------|-------------|---------|
| 11 | SOCS1    | 16 | 11349032  | 42.81 | nonsynonymous SNV    | c.C304G     | p.L102V   |               | Driver    | .           | Deleterious | Medium  |
| 11 | SOCS1    | 16 | 11349260  | 31.95 | frameshift deletion  | c.76delT    | p.S26fs   |               | Driver    | .           | .           | .       |
| 12 | PIM1     | 6  | 37139090  | 10.55 | nonsynonymous SNV    | c.G703A     | p.A235T   | Only Ampliseq | Passenger | .           | Tolerated   | Low     |
| 12 | PIM1     | 6  | 37139111  | 31.95 | nonsynonymous SNV    | c.G724A     | p.V242M   | Only Ampliseq | Driver    | COSM4610025 | Deleterious | Low     |
| 12 | PIM1     | 6  | 37139204  | 30.43 | nonsynonymous SNV    | c.C817G     | p.L273V   | Only Ampliseq | Passenger | .           | Tolerated   | Neutral |
| 13 | MYD88    | 3  | 38182641  | 38.8  | nonsynonymous SNV    | c.T794C     | p.L265P   | Validated     | Driver    | COSM85940   | Deleterious | .       |
| 13 | TBL1XR1  | 3  | 176752054 | 69.4  | nonsynonymous SNV    | c.T1182G    | p.I394M   |               | Driver    | .           | Deleterious | Medium  |
| 13 | HIST1H1E | 6  | 26157108  | 66.5  | nonsynonymous SNV    | c.G490A     | p.A164T   |               | Driver    | .           | Tolerated   | Medium  |
| 13 | HIST1H1D | 6  | 26234590  | 64.8  | nonsynonymous SNV    | c.C572G     | p.A191G   |               | Driver    | .           | Tolerated   | Medium  |
| 13 | CCND3    | 6  | 41903745  | 35.4  | frameshift insertion | c.811dupC   | p.R271fs  |               | Driver    | COSM144854  | .           | .       |
| 13 | ACTB     | 7  | 5568876   | 33.1  | nonsynonymous SNV    | c.G279C     | p.E93D    |               | Driver    | .           | .           | Medium  |
| 13 | ETS1     | 11 | 128391824 | 26.4  | nonsynonymous SNV    | c.G66C      | p.E22D    |               | Driver    | COSM220622  | Tolerated   | Neutral |
| 13 | KMT2D    | 12 | 49421674  | 48.3  | frameshift insertion | c.14554dupA | p.T4852fs |               | Driver    | .           | .           | .       |
| 14 | PIM1     | 6  | 37139063  | 98    | nonsynonymous SNV    | c.G676C     | p.E226Q   | Only Ampliseq | Passenger | .           | Deleterious | Neutral |
| 14 | PIM1     | 6  | 37138804  | 86    | nonsynonymous SNV    | c.G510C     | p.E170D   | Only Ampliseq | Driver    | COSM220741  | Tolerated   | Neutral |
| 14 | PIM1     | 6  | 37139072  | 82    | nonsynonymous SNV    | c.G685C     | p.A229P   | Only Ampliseq | Driver    | COSM4171580 | Tolerated   | Neutral |
| 14 | PIM1     | 6  | 37139081  | 82    | nonsynonymous SNV    | c.G694A     | p.E232K   | Only Ampliseq | Driver    | .           | Deleterious | Medium  |
| 14 | PIM1     | 6  | 37139210  | 79    | nonsynonymous SNV    | c.C823G     | p.L275V   | Only Ampliseq | Passenger | .           | Deleterious | Low     |
| 14 | MYD88    | 3  | 38182641  | 53    | nonsynonymous SNV    | c.T794C     | p.L265P   | Only Ampliseq | Driver    | COSM85940   | Deleterious | .       |
| 14 | PIM1     | 6  | 37139004  | 49    | nonsynonymous SNV    | c.G617C     | p.S206T   | Only Ampliseq | Passenger | .           | Deleterious | Low     |
| 14 | PIM1     | 6  | 37138901  | 45    | nonsynonymous SNV    | c.C514T     | p.P172S   | Only Ampliseq | Driver    | COSM5655253 | Tolerated   | Low     |

|    |                 |    |           |      |                        |              |              |               |           |             |             |         |
|----|-----------------|----|-----------|------|------------------------|--------------|--------------|---------------|-----------|-------------|-------------|---------|
| 14 | <i>PIM1</i>     | 6  | 37138379  | 44   | nonsynonymous SNV      | c. G301A     | p.A101T      | Only Ampliseq | Driver    | COSM4171567 | Deleterious | Neutral |
| 14 | <i>PIM1</i>     | 6  | 37139268  | 29   | splice site deletion   | c. G880+1T   | p.?          | Only Ampliseq | Driver    | COSM1191990 | .           | .       |
| 15 | <i>BTG2</i>     | 1  | 203274863 | 22.6 | nonsynonymous SNV      | c.G129C      | p.Q43H       |               | Driver    | .           | Tolerated   | Medium  |
| 15 | <i>BTG2</i>     | 1  | 203276235 | 19.4 | nonsynonymous SNV      | c.A146G      | p.H49R       |               | Passenger | .           | Tolerated   | Low     |
| 15 | <i>MYD88</i>    | 3  | 38182641  | 41.2 | nonsynonymous SNV      | c.T794C      | p.L265P      | Verified      | Driver    | COSM85940   | Deleterious | .       |
| 15 | <i>TBL1XR1</i>  | 3  | 176750836 | 26.8 | nonsynonymous SNV      | c.A1339C     | p.S447R      |               | Driver    | COSM5708570 | Deleterious | Low     |
| 15 | <i>HIST1H1E</i> | 6  | 26156942  | 43.3 | nonsynonymous SNV      | c.C324G      | p.N108K      |               | Passenger | .           | Tolerated   | Low     |
| 15 | <i>HIST1H1E</i> | 6  | 26157054  | 39.8 | nonsynonymous SNV      | c.A436G      | p.T146A      |               | Passenger | .           | Tolerated   | Neutral |
| 15 | <i>HIST1H1E</i> | 6  | 26157090  | 38.4 | nonsynonymous SNV      | c.G472A      | p.A158T      |               | Driver    | COSM1076710 | Deleterious | Medium  |
| 15 | <i>PIM1</i>     | 6  | 37138396  | 17.4 | nonframeshift deletion | c.318_326del | p.106_109del | Not Verified  | Driver    | .           | .           | .       |
| 15 | <i>PIM1</i>     | 6  | 37138419  | 24.7 | nonsynonymous SNV      | c.C341G      | p.T114S      | Verified      | Driver    | COSM4171568 | Tolerated   | Neutral |
| 15 | <i>PIM1</i>     | 6  | 37138563  | 24.9 | nonsynonymous SNV      | c.C370G      | p.P124A      | Not Verified  | Passenger | .           | Tolerated   | Neutral |
| 15 | <i>PIM1</i>     | 6  | 37138630  | 22.5 | nonsynonymous SNV      | c.G437T      | p.G146V      | Not Verified  | Passenger | .           | Deleterious | Low     |
| 15 | <i>PIM1</i>     | 6  | 37138642  | 26.8 | nonsynonymous SNV      | c.C449T      | p.S150F      | Verified      | Passenger | .           | Deleterious | Low     |
| 15 | <i>PIM1</i>     | 6  | 37138775  | 6.1  | nonsynonymous SNV      | c.G481C      | p.E161Q      | Not Verified  | Passenger | .           | Tolerated   | Neutral |
| 15 | <i>PIM1</i>     | 6  | 37138800  | 28.4 | nonsynonymous SNV      | c.G506A      | p.G169E      | Verified      | Driver    | COSM6210491 | Tolerated   | Neutral |
| 15 | <i>PIM1</i>     | 6  | 37138908  | 24.7 | nonsynonymous SNV      | c.G521A      | p.G174D      | Verified      | Driver    | COSM1581465 | Tolerated   | Low     |
| 15 | <i>PIM1</i>     | 6  | 37138911  | 20.9 | nonsynonymous SNV      | c.C524G      | p.T175S      | Verified      | Passenger | .           | Tolerated   | Neutral |
| 15 | <i>PIM1</i>     | 6  | 37138950  | 23.3 | nonsynonymous SNV      | c.G563C      | p.S188T      |               | Passenger | .           | Tolerated   | Low     |
| 15 | <i>PIM1</i>     | 6  | 37139063  | 23.4 | stopgain               | c.G676T      | p.E226X      | Verified      | Driver    | .           | .           | .       |
| 15 | <i>PIM1</i>     | 6  | 37139098  | 24.3 | nonsynonymous SNV      | c.C711G      | p.S237R      | Verified      | Driver    | COSM220743  | Tolerated   | Neutral |
| 15 | <i>ETS1</i>     | 11 | 128391836 | 22.9 | frameshift deletion    | c.54delA     | p.K18fs      |               | Driver    | COSM5018866 | .           | .       |

|    |               |    |           |      |                     |                |          |              |           |             |             |         |
|----|---------------|----|-----------|------|---------------------|----------------|----------|--------------|-----------|-------------|-------------|---------|
| 15 | <i>BTG1</i>   | 12 | 92539173  | 20.3 | nonsynonymous SNV   | c.C139G        | p.L47V   |              | Passenger | .           | Tolerated   | Low     |
| 15 | <i>BTG1</i>   | 12 | 92539295  | 19.6 | nonsynonymous SNV   | c.C17T         | p.T6I    |              | Passenger | .           | Tolerated   | Neutral |
| 15 | <i>BTG1</i>   | 12 | 92539304  | 19.2 | nonsynonymous SNV   | c.C8G          | p.P3R    |              | Passenger | .           | Tolerated   | Low     |
| 15 | <i>FOXO1</i>  | 13 | 41240264  | 21.5 | nonsynonymous SNV   | c.G86A         | p.R29K   |              | Driver    | .           | Deleterious | Medium  |
| 15 | <i>CIITA</i>  | 16 | 11001126  | 51.3 | frameshift deletion | c.1777_1778del | p.R593fs |              | Driver    | .           | .           | .       |
| 15 | <i>PRKCB</i>  | 16 | 23847561  | 47.6 | nonsynonymous SNV   | c.G65A         | p.R22H   |              | Driver    | .           | Deleterious | Medium  |
| 15 | <i>CD79B</i>  | 17 | 62006798  | 26.9 | nonsynonymous SNV   | c.A590C        | p.Y197S  | Verified     | Driver    | COSM220733  | Deleterious | Neutral |
| 15 | <i>EP300</i>  | 22 | 41565532  | 24.2 | nonsynonymous SNV   | c.A4198C       | p.S1400R |              | Driver    | COSM6654392 | Deleterious | High    |
| 16 | <i>ARID1A</i> | 1  | 27094401  | 49.1 | nonsynonymous SNV   | c.G3109C       | p.G1037R |              | Passenger | .           | Tolerated   | Neutral |
| 16 | <i>BTG2</i>   | 1  | 203276365 | 43.1 | frameshift deletion | c.276_280del   | p.L92fs  |              | Driver    | .           | .           | .       |
| 16 | <i>BTG2</i>   | 1  | 203276370 | 43.4 | nonsynonymous SNV   | c.A281T        | p.Q94L   |              | Passenger | .           | Tolerated   | Neutral |
| 16 | <i>MYD88</i>  | 3  | 38182641  | 70.2 | nonsynonymous SNV   | c.T794C        | p.L265P  | Verified     | Driver    | COSM85940   | Deleterious | .       |
| 16 | <i>SETD2</i>  | 3  | 47125398  | 12.6 | nonsynonymous SNV   | c.G5872A       | p.A1958T |              | Passenger | .           | Tolerated   | Neutral |
| 16 | <i>IRF4</i>   | 6  | 393360    | 32.5 | nonsynonymous SNV   | c.C208G        | p.L70V   | Verified     | Driver    | COSM4610567 | Deleterious | Low     |
| 16 | <i>PIM1</i>   | 6  | 37138563  | 27.5 | nonsynonymous SNV   | c.C370T        | p.P124S  | Verified     | Driver    | COSM3076476 | Tolerated   | Neutral |
| 16 | <i>PIM1</i>   | 6  | 37138615  | 28.2 | nonsynonymous SNV   | c.G422A        | p.G141D  | Verified     | Driver    | COSM6204719 | Deleterious | High    |
| 16 | <i>PIM1</i>   | 6  | 37138908  | 32.9 | nonsynonymous SNV   | c.G521A        | p.G174D  | Verified     | Driver    | COSM1581465 | Tolerated   | Low     |
| 16 | <i>PIM1</i>   | 6  | 37138919  | 33.8 | nonsynonymous SNV   | c.C532T        | p.P178S  | Verified     | Passenger | .           | Deleterious | Low     |
| 16 | <i>PIM1</i>   | 6  | 37138955  | 25.5 | nonsynonymous SNV   | c.G568A        | p.G190S  |              | Passenger | .           | Deleterious | Neutral |
| 16 | <i>PIM1</i>   | 6  | 37138957  | 25.7 | frameshift deletion | c.570_571del   | p.G190fs |              | Driver    | .           | .           | .       |
| 16 | <i>PIM1</i>   | 6  | 37139108  | 31.4 | stopgain            | c.C721T        | p.Q241X  | Not Verified | Driver    | .           | .           | .       |
| 16 | <i>PIM1</i>   | 6  | 37139189  | 32.4 | nonsynonymous SNV   | c.C802G        | p.L268V  | Verified     | Passenger | .           | Deleterious | Low     |

|    |          |    |           |      |                      |                |          |          |           |             |             |         |
|----|----------|----|-----------|------|----------------------|----------------|----------|----------|-----------|-------------|-------------|---------|
| 16 | PIM1     | 6  | 37139204  | 30.3 | nonsynonymous SNV    | c.C817G        | p.L273V  | Verified | Passenger | .           | Tolerated   | Neutral |
| 16 | ATM      | 11 | 108159816 | 35.9 | nonsynonymous SNV    | c.C4222T       | p.L1408F |          | Driver    | .           | Deleterious | Medium  |
| 16 | ATM      | 11 | 108196068 | 49   | nonsynonymous SNV    | c.T6604G       | p.Y2202D |          | Driver    | .           | Deleterious | Medium  |
| 16 | ETV6     | 12 | 11803094  | 66.6 | frameshift deletion  | c.33delG       | p.K11fs  |          | Driver    | .           | .           | .       |
| 16 | KMT2D    | 12 | 49444250  | 67.4 | stopgain             | c.C3121T       | p.Q1041X |          | Driver    | .           | .           | .       |
| 16 | BTG1     | 12 | 92538170  | 33.5 | nonsynonymous SNV    | c.C202T        | p.R68C   |          | Driver    | .           | Deleterious | Medium  |
| 16 | CD79B    | 17 | 62006799  | 36.1 | nonsynonymous SNV    | c.T589G        | p.Y197D  | Verified | Driver    | COSM1737939 | Deleterious | Neutral |
| 16 | GNA13    | 17 | 63052513  | 34.7 | stopgain             | c.C199T        | p.Q67X   |          | Driver    | COSM2796556 | .           | .       |
| 17 | CD58     | 1  | 117078795 | 37.1 | frameshift insertion | c.419_420insGT | p.V140fs |          | Driver    | .           | .           | .       |
| 17 | BTG2     | 1  | 203274870 | 26.8 | nonsynonymous SNV    | c.C136G        | p.L46V   |          | Driver    | .           | Deleterious | Medium  |
| 17 | KLHL6    | 3  | 183217586 | 33.8 | nonsynonymous SNV    | c.G939T        | p.M313I  |          | Driver    | COSM5985192 | Tolerated   | Neutral |
| 17 | HIST1H1E | 6  | 26156862  | 28.7 | nonsynonymous SNV    | c.C244A        | p.L82M   |          | Passenger | .           | Deleterious | Low     |
| 17 | PIM1     | 6  | 37138377  | 25.2 | nonsynonymous SNV    | c.T299C        | p.L100P  | Verified | Passenger | .           | Deleterious | Neutral |
| 17 | NFKBIE   | 6  | 44232739  | 34.9 | frameshift deletion  | c.759_762del   | p.T253fs |          | Driver    | COSM5416027 | .           | .       |
| 17 | KMT2D    | 12 | 49432227  | 20.4 | nonsynonymous SNV    | c.C8912T       | p.T2971I |          | Passenger | .           | Deleterious | Neutral |
| 17 | FOXO1    | 13 | 41239941  | 27.4 | nonsynonymous SNV    | c.G409A        | p.V137M  |          | Passenger | .           | Tolerated   | Low     |
| 17 | CREBBP   | 16 | 3779598   | 27.8 | nonsynonymous SNV    | c.C5450T       | p.P1817L |          | Driver    | COSM5561772 | Deleterious | Low     |
| 17 | CREBBP   | 16 | 3808901   | 31.1 | nonsynonymous SNV    | c.C3323T       | p.S1108L |          | Driver    | COSM2919997 | Deleterious | Medium  |
| 17 | CD79B    | 17 | 62008703  | 26.7 | nonsynonymous SNV    | c.A113G        | p.N38S   |          | Passenger | .           | Tolerated   | Low     |
| 17 | CD79B    | 17 | 62008710  | 26.6 | nonsynonymous SNV    | c.T106A        | p.Y36N   |          | Passenger | .           | Tolerated   | Low     |
| 17 | XBP1     | 22 | 29196309  | 37.5 | nonsynonymous SNV    | c.C204A        | p.S68R   |          | Driver    | .           | Deleterious | Medium  |
| 20 | FBXW7    | 4  | 153250883 | 3.8  | stopgain             | c.C1177T       | p.R393X  |          | Driver    | COSM22973   | .           | .       |

|    |          |    |           |       |                         |                     |                 |          |           |             |             |         |
|----|----------|----|-----------|-------|-------------------------|---------------------|-----------------|----------|-----------|-------------|-------------|---------|
| 20 | NOTCH1   | 9  | 139399245 | 5.4   | nonsynonymous SNV       | c.G4898A            | p.R1633H        |          | Passenger | .           | Deleterious | Low     |
| 20 | POU2F2   | 19 | 42599703  | 28.5  | frameshift deletion     | c.948delT           | p.F316fs        |          | Driver    | .           | .           | .       |
| 21 | MYD88    | 3  | 38182641  | 67.7  | nonsynonymous SNV       | c.T794C             | p.L265P         | Verified | Driver    | COSM85940   | Deleterious | .       |
| 21 | TBL1XR1  | 3  | 176756175 | 66.6  | nonframeshift deletion  | c.971_973del        | p.324_325del    |          | Driver    | COSM3205534 | .           | .       |
| 21 | HIST1H1E | 6  | 26156766  | 60.5  | nonsynonymous SNV       | c.G148A             | p.A50T          |          | Driver    | .           | Tolerated   | Medium  |
| 21 | PIM1     | 6  | 37139039  | 4.6   | stopgain                | c.C652T             | p.Q218X         |          | Driver    | COSM327134  | .           | .       |
| 21 | TP53     | 17 | 7577094   | 37    | nonsynonymous SNV       | c.C844T             | p.R282W         |          | Driver    | COSM10704   | Deleterious | Medium  |
| 22 | PIK3CD   | 1  | 9784870   | 48.9  | nonsynonymous SNV       | c.G2873A            | p.G958D         |          | Passenger | .           | Tolerated   | Neutral |
| 22 | CD58     | 1  | 117113592 | 26    | nonsynonymous SNV       | c.G3A               | p.M1I           |          | Driver    | COSM5704871 | Deleterious | .       |
| 22 | TMEM30A  | 6  | 75969072  | 32.1  | stopgain                | c.C676T             | p.R226X         |          | Driver    | COSM597553  | .           | .       |
| 22 | KMT2D    | 12 | 49426798  | 33.1  | stopgain                | c.T11690G           | p.L3897X        |          | Driver    | COSM5670280 | .           | .       |
| 22 | PRKCB    | 16 | 24196803  | 30.3  | nonsynonymous SNV       | c.A1637T            | p.E546V         |          | Driver    | COSM5706084 | Deleterious | Neutral |
| 23 | ARID1A   | 1  | 27094308  | 29.1  | stopgain                | c.G3016T            | p.E1006X        |          | Driver    | COSM464363  | .           | .       |
| 23 | CARD11   | 7  | 2977549   | 26.2  | nonsynonymous SNV       | c.C1135T            | p.R379W         | Verified | Driver    | .           | Deleterious | Medium  |
| 23 | CARD11   | 7  | 2984163   | 10.4  | nonsynonymous SNV       | c.G367A             | p.G123S         | Verified | Driver    | COSM41655   | Tolerated   | Medium  |
| 23 | B2M      | 15 | 45007804  | 51.2  | frameshift insertion    | c.252dupC           | p.L84fs         |          | Driver    | .           | .           | .       |
| 25 | TNFRSF14 | 1  | 2489231   | 46.55 | nonsynonymous SNV       | c.G136A             | p.E46K          |          | Driver    | COSM6213102 | Deleterious | Medium  |
| 25 | TNFRSF14 | 1  | 2491318   | 24.87 | nonsynonymous SNV       | c.T361C             | p.C121R         |          | Driver    | .           | Deleterious | High    |
| 25 | CREBBP   | 16 | 3786767   | 29.93 | nonsynonymous SNV       | c.T4444A            | p.Y1482N        |          | Driver    | COSM220499  | Deleterious | High    |
| 25 | POU2F2   | 19 | 42600030  | 32.79 | nonsynonymous SNV       | c.A715G             | p.T239A         |          | Driver    | COSM1316489 | Deleterious | Medium  |
| 25 | KMT2D    | 12 | 49427265  | 19.55 | nonframeshift insertion | c.11222_11223insGCA | p.Q3741delinsQQ |          | Driver    | COSM4385667 | .           | .       |
| 25 | KMT2D    | 12 | 49427690  | 35.89 | stopgain                | c.C10798T           | p.Q3600X        |          | Driver    | .           | .           | .       |

|    |                |    |           |       |                        |                |                |           |             |             |         |
|----|----------------|----|-----------|-------|------------------------|----------------|----------------|-----------|-------------|-------------|---------|
| 25 | <i>BCL2</i>    | 18 | 60985743  | 51.09 | nonsynonymous SNV      | c.C157T        | p.P53S         | Driver    | COSM220914  | Tolerated   | Neutral |
| 25 | <i>GNA13</i>   | 17 | 63010719  | 37.12 | nonsynonymous SNV      | c.C790T        | p.R264C        | Driver    | .           | Deleterious | High    |
| 25 | <i>GNA13</i>   | 17 | 63049797  | 28.32 | frameshift insertion   | c.332dupG      | p.G111fs       | Driver    | .           | .           | .       |
| 25 | <i>MAP2K1</i>  | 15 | 66774131  | 35.66 | nonsynonymous SNV      | c.G607A        | p.E203K        | Driver    | COSM232755  | Deleterious | Low     |
| 25 | <i>EZH2</i>    | 7  | 148508728 | 32.64 | nonsynonymous SNV      | c.T1936C       | p.Y646H        | Driver    | COSM220732  | Deleterious | High    |
| 25 | <i>TBL1XR1</i> | 3  | 176755957 | 38.38 | nonsynonymous SNV      | c.G1051A       | p.E351K        | Passenger | .           | Deleterious | Neutral |
| 26 | <i>TBL1XR1</i> | 3  | 176769376 | 46.7  | nonsynonymous SNV      | c.G343A        | p.A115T        | Passenger | .           | Tolerated   | Neutral |
| 26 | <i>IRF4</i>    | 6  | 393296    | 44.0  | nonsynonymous SNV      | c.C144G        | p.S48R         | Passenger | .           | Deleterious | Neutral |
| 26 | <i>EZH2</i>    | 7  | 148508727 | 48.0  | nonsynonymous SNV      | c.A1937G       | p.Y646C        | Driver    | COSM3259630 | Deleterious | High    |
| 26 | <i>CREBBP</i>  | 16 | 3781324   | 35.9  | nonframeshift deletion | c.5039_5041del | p.1680_1681del | Driver    | COSM291735  | .           | .       |
| 26 | <i>CREBBP</i>  | 16 | 3807376   | 47.6  | nonsynonymous SNV      | c.A3611T       | p.Y1204F       | Driver    | COSM4579032 | Tolerated   | Low     |
| 26 | <i>SMARCA4</i> | 19 | 11144146  | 41.6  | nonsynonymous SNV      | c.C3727T       | p.R1243W       | Driver    | COSM1136101 | Deleterious | Medium  |
| 26 | <i>EP300</i>   | 22 | 41525969  | 13.0  | nonsynonymous SNV      | c.T1244C       | p.L415P        | Driver    | COSM221269  | Deleterious | Medium  |
| 27 | <i>TBL1XR1</i> | 3  | 176769503 | 8     | frameshift insertion   | c.215_216insAA | p.L72fs        | Driver    | .           | .           | .       |
| 27 | <i>MYC</i>     | 8  | 128750681 | 39.9  | nonsynonymous SNV      | c.C218A        | p.T73N         | Driver    | COSM3316882 | Deleterious | Medium  |
| 27 | <i>MYC</i>     | 8  | 128750749 | 40.1  | nonsynonymous SNV      | c.T286C        | p.S96P         | Passenger | .           | Deleterious | Low     |
| 27 | <i>MYC</i>     | 8  | 128750953 | 23.1  | nonsynonymous SNV      | c.C490G        | p.L164V        | Driver    | COSM3316932 | Tolerated   | Medium  |
| 27 | <i>MYC</i>     | 8  | 128752788 | 37.1  | nonsynonymous SNV      | c.G949C        | p.V317L        | Driver    | .           | Deleterious | Medium  |
| 27 | <i>MYC</i>     | 8  | 128752894 | 37.2  | nonsynonymous SNV      | c.G1055A       | p.S352N        | Driver    | .           | Deleterious | Medium  |
| 27 | <i>STAT6</i>   | 12 | 57493818  | 30.1  | nonsynonymous SNV      | c.A1568T       | p.D523V        | Driver    | COSM5946952 | Deleterious | Low     |
| 27 | <i>FOXO1</i>   | 13 | 41240288  | 35.5  | nonsynonymous SNV      | c.G62C         | p.R21P         | Driver    | .           | Deleterious | Medium  |



|    |        |    |           |      |                         |                  |                |           |             |             |         |
|----|--------|----|-----------|------|-------------------------|------------------|----------------|-----------|-------------|-------------|---------|
| 27 | SOCS1  | 16 | 11349001  | 36.1 | nonframeshift insertion | c.334_335insGC T | p.F112delinsCF | Driver    | .           | .           | .       |
| 31 | MYD88  | 3  | 38182032  | 38.7 | nonsynonymous SNV       | c.C656G          | p.S219C        | Driver    | COSM3357705 | Deleterious | Low     |
| 31 | SETD2  | 3  | 47165947  | 48.9 | nonsynonymous SNV       | c.A179G          | p.K60R         | Passenger | .           | Deleterious | Neutral |
| 31 | BCL6   | 3  | 187443370 | 39.1 | nonsynonymous SNV       | c.C1756T         | p.P586S        | Passenger | .           | Tolerated   | Neutral |
| 31 | TET2   | 4  | 106157768 | 35.4 | stopgain                | c.C2669A         | p.S890X        | Driver    | .           | .           | .       |
| 31 | IRF4   | 6  | 393205    | 7.6  | nonsynonymous SNV       | c.G53A           | p.S18N         | Driver    | COSM1731950 | Tolerated   | Low     |
| 31 | IRF4   | 6  | 393260    | 36.3 | nonsynonymous SNV       | c.G108T          | p.K36N         | Passenger | .           | Tolerated   | Low     |
| 31 | IRF4   | 6  | 393262    | 36.3 | nonsynonymous SNV       | c.A110T          | p.Y37F         | Passenger | .           | Deleterious | Low     |
| 31 | IRF4   | 6  | 393331    | 32.5 | nonsynonymous SNV       | c.A179T          | p.Q60L         | Driver    | .           | Deleterious | Medium  |
| 31 | IRF4   | 6  | 393334    | 18.0 | nonsynonymous SNV       | c.A182C          | p.D61A         | Driver    | .           | Deleterious | Medium  |
| 31 | ATM    | 11 | 108160402 | 33.2 | nonsynonymous SNV       | c.G4310T         | p.R1437I       | Driver    | .           | Deleterious | Medium  |
| 31 | MAP2K1 | 15 | 66727441  | 34.6 | nonsynonymous SNV       | c.T157G          | p.F53V         | Driver    | COSM5077832 | Deleterious | Medium  |
| 31 | BTK    | X  | 100617205 | 38.4 | nonsynonymous SNV       | c.C544T          | p.R182W        | Driver    | COSM6388601 | Deleterious | Neutral |
| 33 | TP53   | 17 | 7577094   | 84.5 | nonsynonymous SNV       | c.C844T          | p.R282W        | Driver    | COSM10704   | Deleterious | Medium  |
| 33 | MYC    | 8  | 128750639 | 47.4 | nonsynonymous SNV       | c.C176T          | p.A59V         | Driver    | COSM1159797 | Deleterious | Medium  |
| 34 | BCL10  | 1  | 85733340  | 69.9 | frameshift deletion     | c.672delC        | p.P224fs       | Driver    | .           | .           | .       |
| 34 | BCL10  | 1  | 85736474  | 66.6 | nonsynonymous SNV       | c.G173A          | p.R58Q         | Driver    | COSM6205554 | Tolerated   | Neutral |
| 34 | TNIP1  | 5  | 150443224 | 4.3  | nonsynonymous SNV       | c.C221A          | p.P74Q         | Passenger | .           | Tolerated   | Low     |
| 34 | KMT2D  | 12 | 49416417  | 34.5 | nonsynonymous SNV       | c.C16294T        | p.R5432W       | Driver    | COSM221066  | Deleterious | High    |
| 34 | KMT2D  | 12 | 49421002  | 5.8  | nonsynonymous SNV       | c.C14747A        | p.P4916Q       | Driver    | .           | Deleterious | Medium  |
| 34 | KMT2D  | 12 | 49426511  | 30.8 | stopgain                | c.C11977T        | p.Q3993X       | Driver    | .           | .           | .       |
| 34 | KMT2D  | 12 | 49435116  | 50.5 | nonsynonymous SNV       | c.C6437T         | p.P2146L       | Driver    | COSM3461579 | Deleterious | Low     |

|    |          |    |           |      |                     |            |           |           |             |             |         |
|----|----------|----|-----------|------|---------------------|------------|-----------|-----------|-------------|-------------|---------|
| 34 | FOXO1    | 13 | 41240288  | 29.1 | nonsynonymous SNV   | c.G62A     | p.R21H    | Driver    | COSM5948480 | Deleterious | Medium  |
| 34 | CREBBP   | 16 | 3788618   | 66   | nonsynonymous SNV   | c.C4336T   | p.R1446C  | Driver    | COSM88749   | Deleterious | Medium  |
| 34 | CIITA    | 16 | 10997681  | 35.5 | nonsynonymous SNV   | c.C866A    | p.P289H   | Passenger | .           | Deleterious | Low     |
| 34 | TP53     | 17 | 7577570   | 30.7 | nonsynonymous SNV   | c.G711A    | p.M237I   | Driver    | COSM99648   | Deleterious | Medium  |
| 34 | BCL2     | 18 | 60985469  | 2.9  | nonsynonymous SNV   | c.G431T    | p.W144L   | Driver    | .           | Deleterious | Medium  |
| 34 | BCL2     | 18 | 60985753  | 6.7  | nonsynonymous SNV   | c.C147G    | p.F49L    | Passenger | .           | Tolerated   | Low     |
| 34 | EP300    | 22 | 41569723  | 3.3  | nonsynonymous SNV   | c.G4714T   | p.G1572W  | Driver    | COSM5608364 | Deleterious | Medium  |
| 35 | TET2     | 4  | 106164875 | 68.5 | frameshift deletion | c.3743delT | p.L1248fs | Driver    | .           | .           | .       |
| 35 | NFKBIE   | 6  | 44229498  | 8.5  | frameshift deletion | c.973delC  | p.R325fs  | Driver    | .           | .           | .       |
| 35 | TMEM30A  | 6  | 75970579  | 49.1 | nonsynonymous SNV   | c.A502G    | p.I168V   | Driver    | .           | Tolerated   | Medium  |
| 35 | MYC      | 8  | 128750515 | 43.4 | nonsynonymous SNV   | c.C52G     | p.L18V    | Passenger | .           | Tolerated   | Low     |
| 35 | MYC      | 8  | 128751013 | 44   | nonsynonymous SNV   | c.A550T    | p.S184C   | Passenger | .           | Deleterious | Low     |
| 38 | ARID1A   | 1  | 27023226  | 30.2 | nonsynonymous SNV   | c.C332A    | p.P111H   | Passenger | .           | Deleterious | Low     |
| 38 | BTG2     | 1  | 203274836 | 42.0 | nonsynonymous SNV   | c.G102T    | p.R34S    | Passenger | .           | Tolerated   | Neutral |
| 38 | BTG2     | 1  | 203274867 | 30.2 | nonsynonymous SNV   | c.G133A    | p.A45T    | Driver    | COSM220663  | Tolerated   | Low     |
| 38 | MYD88    | 3  | 38182641  | 34.6 | nonsynonymous SNV   | c.T794C    | p.L265P   | Driver    | COSM85940   | Deleterious | .       |
| 38 | IRF4     | 6  | 393217    | 67.5 | nonsynonymous SNV   | c.G65A     | p.G22E    | Driver    | COSM5711847 | Tolerated   | Low     |
| 38 | HIST1H1E | 6  | 26157108  | 31.4 | nonsynonymous SNV   | c.G490A    | p.A164T   | Driver    | .           | Tolerated   | Medium  |
| 38 | PIM1     | 6  | 37138775  | 36.8 | nonsynonymous SNV   | c.G481A    | p.E161K   | Passenger | .           | Tolerated   | Neutral |
| 38 | PIM1     | 6  | 37138804  | 35.8 | nonsynonymous SNV   | c.G510C    | p.E170D   | Driver    | COSM220741  | Tolerated   | Neutral |
| 38 | PIM1     | 6  | 37138901  | 23.8 | nonsynonymous SNV   | c.C514A    | p.P172T   | Passenger | .           | Deleterious | Low     |

|    |        |    |           |      |                         |                     |                |           |             |             |         |
|----|--------|----|-----------|------|-------------------------|---------------------|----------------|-----------|-------------|-------------|---------|
| 38 | PIM1   | 6  | 37138946  | 26.4 | nonsynonymous SNV       | c.G559A             | p.V187M        | Driver    | COSM4610023 | Deleterious | Low     |
| 38 | PIM1   | 6  | 37138950  | 28.0 | nonsynonymous SNV       | c.G563A             | p.S188N        | Driver    | COSM220740  | Tolerated   | Neutral |
| 38 | PIM1   | 6  | 37139063  | 31.1 | nonsynonymous SNV       | c.G676A             | p.E226K        | Driver    | COSM1161628 | Deleterious | Neutral |
| 38 | PIM1   | 6  | 37139073  | 29.8 | nonsynonymous SNV       | c.C686T             | p.A229V        | Driver    | COSM5037781 | Tolerated   | Neutral |
| 38 | PIM1   | 6  | 37139204  | 34.4 | nonsynonymous SNV       | c.C817T             | p.L273F        | Passenger | .           | Deleterious | Low     |
| 38 | PIM1   | 6  | 37139210  | 35.2 | nonsynonymous SNV       | c.C823T             | p.L275F        | Driver    | COSM1731954 | Deleterious | Medium  |
| 38 | PIM1   | 6  | 37141842  | 32.4 | nonsynonymous SNV       | c.G1190A            | p.S397N        | Passenger | .           | Tolerated   | Neutral |
| 38 | PRDM1  | 6  | 106553722 | 45.1 | frameshift deletion     | c.1687delC          | p.P563fs       | Driver    | .           | .           | .       |
| 38 | CARD11 | 7  | 2979533   | 6.2  | nonframeshift insertion | c.713_714insTA<br>A | p.K238delinsNK | Driver    | .           | .           | .       |
| 38 | CARD11 | 7  | 2979543   | 40.1 | nonsynonymous SNV       | c.G704C             | p.R235P        | Passenger | .           | Tolerated   | Low     |
| 38 | ETV6   | 12 | 11803087  | 21.8 | nonsynonymous SNV       | c.G26A              | p.S9N          | Passenger | .           | Tolerated   | Neutral |
| 38 | ETV6   | 12 | 12037507  | 75.3 | nonsynonymous SNV       | c.T1138G            | p.W380G        | Driver    | COSM5879370 | Deleterious | High    |
| 38 | KMT2D  | 12 | 49420291  | 22.3 | nonsynonymous SNV       | c.G15458A           | p.R5153Q       | Driver    | COSM4976622 | Deleterious | Medium  |
| 38 | BTG1   | 12 | 92539209  | 46.8 | stopgain                | c.C103T             | p.R35X         | Driver    | COSM1289866 | .           | .       |
| 38 | BTG1   | 12 | 92539253  | 16.8 | nonsynonymous SNV       | c.C59T              | p.S20F         | Passenger | .           | Deleterious | Neutral |
| 38 | BTG1   | 12 | 92539265  | 16.2 | nonsynonymous SNV       | c.C47A              | p.A16D         | Driver    | .           | Tolerated   | Medium  |
| 38 | CD79B  | 17 | 62006798  | 40.5 | nonsynonymous SNV       | c.A590G             | p.Y197C        | Driver    | COSM220736  | Deleterious | Neutral |
| 38 | BCL2   | 18 | 60985883  | 68.8 | nonsynonymous SNV       | c.G17A              | p.R6K          | Passenger | .           | Tolerated   | Low     |
| 39 | CD58   | 1  | 117078722 | 43.2 | stopgain                | c.C493T             | p.Q165X        | Driver    | COSM4021031 | .           | .       |
| 39 | BCL6   | 3  | 187442853 | 14   | nonsynonymous SNV       | c.G1853A            | p.R618H        | Driver    | COSM350824  | Deleterious | Low     |
| 39 | BCL6   | 3  | 187443373 | 9    | nonsynonymous SNV       | c.C1753T            | p.R585W        | Driver    | COSM252378  | Tolerated   | Medium  |

|    |                |    |           |       |                      |                |           |           |             |             |         |
|----|----------------|----|-----------|-------|----------------------|----------------|-----------|-----------|-------------|-------------|---------|
| 39 | <i>CCND3</i>   | 6  | 41903745  | 23.3  | frameshift insertion | c.811dupC      | p.R271fs  | Driver    | COSM144854  | .           | .       |
| 39 | <i>BTG1</i>    | 12 | 92538191  | 30.7  | nonsynonymous SNV    | c.C181T        | p.P61S    | Driver    | .           | Deleterious | Medium  |
| 39 | <i>CIITA</i>   | 16 | 11001150  | 32.9  | nonsynonymous SNV    | c.C1801T       | p.R601W   | Driver    | COSM4672440 | Deleterious | Low     |
| 39 | <i>GNA13</i>   | 17 | 63052492  | 56.5  | stopgain             | c.C220T        | p.Q74X    | Driver    | .           | .           | .       |
| 39 | <i>EP300</i>   | 22 | 41572350  | 8.2   | nonsynonymous SNV    | c.C4879T       | p.R1627W  | Driver    | COSM88784   | Deleterious | High    |
| 40 | <i>CARD11</i>  | 7  | 2953019   | 47.08 | nonsynonymous SNV    | c.G2921A       | p.R974H   | Passenger | .           | Tolerated   | Low     |
| 41 | <i>PIM1</i>    | 6  | 37138908  | 44.1  | nonsynonymous SNV    | c.G521C        | p.G174A   | Passenger | .           | Deleterious | Neutral |
| 41 | <i>SGK1</i>    | 6  | 134495673 | 55.1  | nonsynonymous SNV    | c.C413G        | p.A138G   | Driver    | .           | Deleterious | Medium  |
| 41 | <i>ETS1</i>    | 11 | 128391823 | 27.3  | nonsynonymous SNV    | c.C67T         | p.L23F    | Driver    | COSM220621  | Tolerated   | Neutral |
| 41 | <i>CREBBP</i>  | 16 | 3807853   | 81.6  | nonsynonymous SNV    | c.T3566G       | p.I1189S  | Driver    | .           | Deleterious | Medium  |
| 41 | <i>CREBBP</i>  | 16 | 3807877   | 81.6  | nonsynonymous SNV    | c.T3542C       | p.L1181P  | Driver    | .           | Deleterious | Medium  |
| 41 | <i>SOCS1</i>   | 16 | 11348837  | 29    | nonsynonymous SNV    | c.C499T        | p.R167C   | Driver    | .           | Deleterious | Medium  |
| 41 | <i>SOCS1</i>   | 16 | 11349139  | 53.9  | nonsynonymous SNV    | c.G197C        | p.R66P    | Driver    | COSM4170735 | Tolerated   | Neutral |
| 41 | <i>TP53</i>    | 17 | 7578541   | 70.2  | nonsynonymous SNV    | c.T389G        | p.L130R   | Driver    | COSM1610872 | Deleterious | Medium  |
| 44 | <i>CARD11</i>  | 7  | 2984147   | 11.4  | nonsynonymous SNV    | c.C383T        | p.T128M   | Driver    | COSM41656   | Deleterious | Medium  |
| 44 | <i>CARD11</i>  | 7  | 2984163   | 53.0  | nonsynonymous SNV    | c.G367A        | p.G123S   | Driver    | COSM41655   | Tolerated   | Medium  |
| 44 | <i>CREBBP</i>  | 16 | 3781199   | 28.4  | frameshift deletion  | c.5160_5166del | p.C1720fs | Driver    | .           | .           | .       |
| 44 | <i>IRF4</i>    | 6  | 393262    | 18.0  | nonsynonymous SNV    | c.A110T        | p.Y37F    | Passenger | .           | Deleterious | Low     |
| 44 | <i>BTG1</i>    | 12 | 92539304  | 23.2  | nonsynonymous SNV    | c.C8T          | p.P3L     | Passenger | .           | Deleterious | Low     |
| 44 | <i>TP53</i>    | 17 | 7577539   | 42.4  | nonsynonymous SNV    | c.C742T        | p.R248W   | Driver    | COSM10656   | Deleterious | Medium  |
| 44 | <i>SMARCA4</i> | 19 | 11141492  | 30.5  | nonsynonymous SNV    | c.C3469T       | p.R1157W  | Driver    | COSM3357072 | Deleterious | High    |
| 44 | <i>MAPK1</i>   | 22 | 22161975  | 48.5  | nonsynonymous SNV    | c.A280G        | p.T94A    | Passenger | .           | Tolerated   | Neutral |

|    |         |    |           |       |                        |              |           |           |             |             |         |
|----|---------|----|-----------|-------|------------------------|--------------|-----------|-----------|-------------|-------------|---------|
| 45 | ID3     | 1  | 23885779  | 95.32 | nonsynonymous SNV      | c.T139C      | p.C47R    | Driver    | .           | Deleterious | Medium  |
| 45 | SGK1    | 6  | 134583148 | 50    | nonsynonymous SNV      | c.G208A      | p.G70S    | Passenger | .           | Tolerated   | .       |
| 45 | TP53    | 17 | 7578464   | 82.52 | frameshift deletion    | c.454_466del | p.P152fs  | Driver    | COSM1480077 | .           | .       |
| 47 | BCL10   | 1  | 85736511  | 3.37  | frameshift deletion    | c.136delA    | p.I46fs   | Driver    | COSM391505  | .           | .       |
| 47 | TBL1XR1 | 3  | 176769373 | 33.89 | nonsynonymous SNV      | c.G346T      | p.A116S   | Passenger | .           | Tolerated   | Neutral |
| 47 | BCL6    | 3  | 187444552 | 54.13 | nonsynonymous SNV      | c.G1675C     | p.G559R   | Passenger | .           | Deleterious | Low     |
| 47 | TET2    | 4  | 106155620 | 3.34  | nonsynonymous SNV      | c.C521A      | p.P174H   | Driver    | COSM5574230 | Deleterious | Neutral |
| 47 | ATM     | 11 | 108153600 | 6.97  | nonsynonymous SNV      | c.T3740C     | p.F1247S  | Driver    | .           | Deleterious | Medium  |
| 47 | KMT2D   | 12 | 49433388  | 36.68 | stopgain               | c.C8059T     | p.R2687X  | Driver    | COSM220685  | .           | .       |
| 47 | KMT2D   | 12 | 49441815  | 32.15 | frameshift insertion   | c.4168dupG   | p.A1390fs | Driver    | COSM2007252 | .           | .       |
| 47 | TP53    | 17 | 7577586   | 40.34 | nonsynonymous SNV      | c.T695G      | p.I232S   | Driver    | COSM1172473 | Deleterious | Medium  |
| 47 | TP53    | 17 | 7579361   | 33.41 | nonsynonymous SNV      | c.T326C      | p.F109S   | Driver    | COSM148180  | Deleterious | Medium  |
| 47 | TCF3    | 19 | 1625601   | 51.79 | nonsynonymous SNV      | c.G473A      | p.R158Q   | Driver    | .           | Deleterious | Medium  |
| 47 | MAPK1   | 22 | 22221709  | 3.11  | nonframeshift deletion | c.20_22del   | p.7_8del  | Driver    | COSM4700513 | .           | .       |
| 47 | EP300   | 22 | 41546158  | 45.15 | nonsynonymous SNV      | c.C2773A     | p.P925T   | Driver    | COSM88779   | Deleterious | Low     |
| 48 | PIK3CD  | 1  | 9780849   | 34.5  | nonsynonymous SNV      | c.A1571C     | p.Y524S   | Passenger | .           | Tolerated   | Neutral |
| 48 | PIK3CD  | 1  | 9784870   | 48    | nonsynonymous SNV      | c.G2873A     | p.G958D   | Passenger | .           | Tolerated   | Neutral |
| 48 | ID3     | 1  | 23885778  | 37    | nonsynonymous SNV      | c.G140C      | p.C47S    | Driver    | .           | Deleterious | Medium  |
| 48 | ARID1A  | 1  | 27024002  | 29.5  | frameshift deletion    | c.1108delG   | p.G370fs  | Driver    | COSM4613001 | .           | .       |
| 48 | NOTCH2  | 1  | 120459185 | 45.5  | nonsynonymous SNV      | c.A6160T     | p.M2054L  | Passenger | .           | Tolerated   | Low     |
| 48 | BTG2    | 1  | 203274817 | 35    | nonsynonymous SNV      | c.G83C       | p.G28A    | Driver    | .           | Deleterious | Medium  |

|    |                 |    |           |      |                   |           |          |           |             |             |         |
|----|-----------------|----|-----------|------|-------------------|-----------|----------|-----------|-------------|-------------|---------|
| 48 | <i>BTG2</i>     | 1  | 203274826 | 34.6 | nonsynonymous SNV | c.G92C    | p.S31T   | Driver    | COSM6205695 | Tolerated   | Medium  |
| 48 | <i>BTG2</i>     | 1  | 203274867 | 34.6 | nonsynonymous SNV | c.G133A   | p.A45T   | Driver    | COSM220663  | Tolerated   | Low     |
| 48 | <i>BTG2</i>     | 1  | 203274874 | 32.2 | nonsynonymous SNV | c.C140T   | p.T47I   | Passenger | .           | Tolerated   | Low     |
| 48 | <i>BTG2</i>     | 1  | 203276252 | 39   | nonsynonymous SNV | c.T163C   | p.F55L   | Driver    | .           | Deleterious | Medium  |
| 48 | <i>HIST1H1E</i> | 6  | 26157278  | 48.8 | stoploss          | c.G660C   | p.X220Y  | Driver    | COSM4429012 | .           | .       |
| 48 | <i>PIM1</i>     | 6  | 37138402  | 33.1 | nonsynonymous SNV | c.C324G   | p.C108W  | Passenger | .           | Tolerated   | Neutral |
| 48 | <i>PIM1</i>     | 6  | 37138804  | 38.2 | nonsynonymous SNV | c.G510C   | p.E170D  | Driver    | COSM220741  | Tolerated   | Neutral |
| 48 | <i>PIM1</i>     | 6  | 37139237  | 37.3 | nonsynonymous SNV | c.C850G   | p.L284V  | Driver    | COSM4610415 | Deleterious | Neutral |
| 48 | <i>SGK1</i>     | 6  | 134495154 | 56   | nonsynonymous SNV | c.C502T   | p.P168S  | Driver    | COSM220581  | Tolerated   | Neutral |
| 48 | <i>SGK1</i>     | 6  | 134495155 | 55.9 | nonsynonymous SNV | c.C501G   | p.N167K  | Passenger | .           | Tolerated   | Low     |
| 48 | <i>ACTB</i>     | 7  | 5569221   | 39.9 | nonsynonymous SNV | c.G68C    | p.G23A   | Driver    | .           | .           | High    |
| 48 | <i>ACTB</i>     | 7  | 5569280   | 33.3 | nonsynonymous SNV | c.T9A     | p.D3E    | Passenger | .           | .           | Neutral |
| 48 | <i>ETS1</i>     | 11 | 128391849 | 53.1 | nonsynonymous SNV | c.T41C    | p.I14T   | Passenger | .           | Tolerated   | Low     |
| 48 | <i>ETS1</i>     | 11 | 128391865 | 53.8 | nonsynonymous SNV | c.C25T    | p.P9S    | Driver    | COSM5703912 | Deleterious | Low     |
| 48 | <i>KMT2D</i>    | 12 | 49420341  | 23   | nonsynonymous SNV | c.T15408G | p.H5136Q | Driver    | .           | Deleterious | High    |
| 48 | <i>BTG1</i>     | 12 | 92539203  | 51.8 | nonsynonymous SNV | c.C109A   | p.L37M   | Driver    | COSM1580631 | Deleterious | Medium  |
| 48 | <i>B2M</i>      | 15 | 45003764  | 54.3 | stopgain          | c.T20G    | p.L7X    | Driver    | .           | .           | .       |
| 48 | <i>CREBBP</i>   | 16 | 3781809   | 38.9 | nonsynonymous SNV | c.A4858C  | p.K1620Q | Driver    | .           | Deleterious | Medium  |
| 48 | <i>SOCS1</i>    | 16 | 11348888  | 4.8  | nonsynonymous SNV | c.C448G   | p.L150V  | Driver    | COSM5714368 | Deleterious | Medium  |
| 48 | <i>TP53</i>     | 17 | 7578406   | 76.1 | nonsynonymous SNV | c.G524A   | p.R175H  | Driver    | COSM10648   | Deleterious | Medium  |
| 48 | <i>EP300</i>    | 22 | 41537161  | 45.3 | nonsynonymous SNV | c.G1988T  | p.G663V  | Passenger | .           | Deleterious | Low     |
| 49 | <i>MYD88</i>    | 3  | 38182641  | 54.2 | nonsynonymous SNV | c.T794C   | p.L265P  | Driver    | COSM85940   | Deleterious | .       |

|    |                 |    |           |       |                      |                  |           |           |             |             |         |
|----|-----------------|----|-----------|-------|----------------------|------------------|-----------|-----------|-------------|-------------|---------|
| 49 | <i>BCL6</i>     | 3  | 187442758 | 28.4  | nonsynonymous SNV    | c.C1948G         | p.R650G   | Driver    | .           | Deleterious | Medium  |
| 49 | <i>PIM1</i>     | 6  | 37138424  | 25.9  | nonsynonymous SNV    | c.C346G          | p.L116V   | Driver    | COSM220737  | Tolerated   | Neutral |
| 49 | <i>KMT2D</i>    | 12 | 49425023  | 46.8  | nonsynonymous SNV    | c.G13465A        | p.G4489R  | Passenger | .           | Deleterious | Low     |
| 49 | <i>SOCS1</i>    | 16 | 11349329  | 7     | nonsynonymous SNV    | c.G7A            | p.A3T     | Driver    | COSM36139   | Deleterious | Low     |
| 49 | <i>IRF8</i>     | 16 | 85954874  | 80.2  | stopgain             | c.C1267T         | p.Q423X   | Driver    | .           | .           | .       |
| 50 | <i>TNFRSF14</i> | 1  | 2489271   | 34.74 | nonsynonymous SNV    | c.C176T          | p.P59L    | Driver    | .           | Deleterious | Medium  |
| 50 | <i>KMT2D</i>    | 12 | 49420438  | 71.98 | nonsynonymous SNV    | c.G15311A        | p.C5104Y  | Driver    | COSM1299424 | Deleterious | High    |
| 50 | <i>KMT2D</i>    | 12 | 49425447  | 23.23 | frameshift deletion  | c.13040_13041del | p.Q4347fs | Driver    | .           | .           | .       |
| 50 | <i>BTG1</i>     | 12 | 92539204  | 27.1  | nonsynonymous SNV    | c.G108C          | p.Q36H    | Driver    | COSM220612  | Deleterious | Medium  |
| 50 | <i>FOXO1</i>    | 13 | 41240289  | 43.37 | nonsynonymous SNV    | c.C61G           | p.R21G    | Driver    | COSM1161087 | Deleterious | Medium  |
| 50 | <i>CREBBP</i>   | 16 | 3786704   | 46.21 | nonsynonymous SNV    | c.T4507G         | p.Y1503D  | Driver    | COSM88743   | Deleterious | High    |
| 50 | <i>BCL2</i>     | 18 | 60985725  | 78.72 | nonsynonymous SNV    | c.C175G          | p.P59A    | Driver    | COSM220907  | Tolerated   | Low     |
| 51 | <i>KLHL6</i>    | 3  | 183209879 | 49    | nonsynonymous SNV    | c.G1702A         | p.E568K   | Passenger | .           | Deleterious | Low     |
| 51 | <i>TET2</i>     | 4  | 106180796 | 51    | nonsynonymous SNV    | c.G3824T         | p.G1275V  | Driver    | .           | Deleterious | Medium  |
| 51 | <i>PIM1</i>     | 6  | 37138559  | 1.8   | nonsynonymous SNV    | c.G366T          | p.K122N   | Passenger | .           | Deleterious | Neutral |
| 51 | <i>MYC</i>      | 8  | 128750638 | 12.6  | nonsynonymous SNV    | c.G175A          | p.A59T    | Driver    | COSM1581274 | Deleterious | Medium  |
| 51 | <i>DIS3</i>     | 13 | 73351589  | 39.3  | nonsynonymous SNV    | c.T623C          | p.I208T   | Driver    | COSM6495430 | Tolerated   | Neutral |
| 52 | <i>TNFRSF14</i> | 1  | 2489883   | 46.32 | frameshift insertion | c.280_281insTG   | p.L94fs   | Driver    | .           | .           | .       |
| 52 | <i>CD58</i>     | 1  | 117086942 | 46.09 | frameshift deletion  | c.352_355del     | p.L118fs  | Driver    | COSM5704865 | .           | .       |
| 52 | <i>PRDM1</i>    | 6  | 106552892 | 45.44 | nonsynonymous SNV    | c.G857C          | p.R286P   | Passenger | .           | Tolerated   | Neutral |
| 52 | <i>ATM</i>      | 11 | 108123551 | 45    | nonsynonymous SNV    | c.C1810T         | p.P604S   | Driver    | COSM22499   | Tolerated   | Medium  |
| 52 | <i>ATM</i>      | 11 | 108160480 | 46.42 | nonsynonymous SNV    | c.T4388G         | p.F1463C  | Driver    | COSM5020988 | Deleterious | Medium  |

|    |          |    |           |       |                         |               |                |           |             |             |         |
|----|----------|----|-----------|-------|-------------------------|---------------|----------------|-----------|-------------|-------------|---------|
| 52 | KRAS     | 12 | 25378647  | 36.59 | nonsynonymous SNV       | c.A351C       | p.K117N        | Driver    | COSM1256061 | Deleterious | High    |
| 52 | CREBBP   | 16 | 3789627   | 32.14 | nonsynonymous SNV       | c.G4232A      | p.G1411E       | Driver    | COSM166405  | Deleterious | High    |
| 52 | PRKCB    | 16 | 23847647  | 36.57 | nonsynonymous SNV       | c.A151T       | p.S51C         | Driver    | .           | Deleterious | Medium  |
| 52 | STAT3    | 17 | 40475070  | 33.85 | nonsynonymous SNV       | c.A1840C      | p.S614R        | Driver    | COSM4066548 | Tolerated   | Medium  |
| 57 | MYD88    | 3  | 38182641  | 53.85 | nonsynonymous SNV       | c.T794C       | p.L265P        | Driver    | COSM85940   | Deleterious | .       |
| 57 | PIM1     | 6  | 37138424  | 26.19 | nonsynonymous SNV       | c.C346G       | p.L116V        | Driver    | COSM220737  | Tolerated   | Neutral |
| 57 | PIM1     | 6  | 37138577  | 32.61 | nonsynonymous SNV       | c.G384C       | p.Q128H        | Driver    | COSM220744  | Tolerated   | Neutral |
| 57 | PIM1     | 6  | 37139063  | 37.14 | nonsynonymous SNV       | c.G676A       | p.E226K        | Driver    | COSM1161628 | Deleterious | Neutral |
| 57 | TMEM30A  | 6  | 75994249  | 29.03 | stopgain                | c.C106T       | p.Q36X         | Driver    | .           | .           | .       |
| 60 | TNFRSF14 | 1  | 2489234   | 27.51 | nonsynonymous SNV       | c.T139A       | p.Y47N         | Driver    | .           | Deleterious | Medium  |
| 60 | PIM1     | 6  | 37138423  | 14.69 | nonsynonymous SNV       | c.G345C       | p.K115N        | Driver    | COSM220742  | Tolerated   | Neutral |
| 60 | SGK1     | 6  | 134494704 | 30    | nonsynonymous SNV       | c.C514T       | p.P172S        | Driver    | COSM1161569 | Tolerated   | Low     |
| 60 | CARD11   | 7  | 2985468   | 58.12 | nonsynonymous SNV       | c.T343G       | p.F115V        | Driver    | COSM43452   | Deleterious | Low     |
| 60 | SOCS1    | 16 | 11349162  | 21.9  | nonsynonymous SNV       | c.C174G       | p.F58L         | Driver    | COSM5576343 | Deleterious | Low     |
| 60 | TCF3     | 19 | 1650226   | 53.78 | nonsynonymous SNV       | c.G22T        | p.A8S          | Driver    | COSM1391233 | Deleterious | Medium  |
| 62 | TNFRSF14 | 1  | 2488107   | 28.22 | frameshift deletion     | c.4_11del     | p.E2fs         | Driver    | .           | .           | .       |
| 62 | PIK3CD   | 1  | 9784870   | 47.84 | nonsynonymous SNV       | c.G2873A      | p.G958D        | Passenger | .           | Tolerated   | Neutral |
| 62 | FBXW7    | 4  | 153332910 | 45.49 | nonframeshift insertion | c.45_46insCCT | p.G16delin sPG | Driver    | COSM27061   | .           | .       |
| 62 | TMEM30A  | 6  | 75970600  | 39.71 | stopgain                | c.C481T       | p.R161X        | Driver    | COSM4640744 | .           | .       |
| 62 | CREBBP   | 16 | 3786704   | 64.1  | nonsynonymous SNV       | c.T4507C      | p.Y1503H       | Driver    | COSM88744   | Deleterious | High    |
| 62 | BCL2     | 18 | 60985385  | 32.73 | nonsynonymous SNV       | c.A515G       | p.N172S        | Driver    | COSM220854  | Tolerated   | Neutral |
| 62 | BCL2     | 18 | 60985756  | 35.18 | nonsynonymous SNV       | c.C144G       | p.I48M         | Passenger | .           | Tolerated   | Low     |



|    |                 |    |           |       |                      |              |           |           |             |             |         |
|----|-----------------|----|-----------|-------|----------------------|--------------|-----------|-----------|-------------|-------------|---------|
| 64 | <i>BTG2</i>     | 1  | 203274870 | 24.44 | nonsynonymous SNV    | c.C136T      | p.L46F    | Driver    | .           | Deleterious | Medium  |
| 64 | <i>MYD88</i>    | 3  | 38181430  | 59.5  | nonsynonymous SNV    | c.A443T      | p.D148V   | Driver    | .           | Deleterious | Medium  |
| 64 | <i>HIST1H1E</i> | 6  | 26156745  | 21.74 | nonsynonymous SNV    | c.C127G      | p.L43V    | Driver    | COSM5948934 | Deleterious | Medium  |
| 64 | <i>TNFAIP3</i>  | 6  | 138199594 | 42.47 | stopgain             | c.G1012T     | p.E338X   | Driver    | .           | .           | .       |
| 64 | <i>KMT2D</i>    | 12 | 49425776  | 21.49 | frameshift insertion | c.12711dupA  | p.R4238fs | Driver    | .           | .           | .       |
| 64 | <i>TP53</i>     | 17 | 7577539   | 42.61 | nonsynonymous SNV    | c.C742T      | p.R248W   | Driver    | COSM10656   | Deleterious | Medium  |
| 64 | <i>TCF3</i>     | 19 | 1615691   | 75.39 | nonsynonymous SNV    | c.G1580A     | p.R527Q   | Driver    | COSM5020244 | Deleterious | Medium  |
| 65 | <i>ID3</i>      | 1  | 23885728  | 20.05 | nonsynonymous SNV    | c.C190G      | p.L64V    | Driver    | COSM6210845 | Tolerated   | Neutral |
| 65 | <i>ARID1A</i>   | 1  | 27023957  | 21.54 | stopgain             | c.C1063T     | p.Q355X   | Driver    | .           | .           | .       |
| 65 | <i>BCL10</i>    | 1  | 85736511  | 2.94  | frameshift deletion  | c.136delA    | p.I46fs   | Driver    | COSM391505  | .           | .       |
| 65 | <i>BTG2</i>     | 1  | 203274762 | 4071  | nonsynonymous SNV    | c.C28T       | p.L10F    | Passenger | .           | Tolerated   | Low     |
| 65 | <i>BTG2</i>     | 1  | 203274853 | 19.13 | frameshift deletion  | c.119_131del | p.G40fs   | Driver    | .           | .           | .       |
| 65 | <i>BTG2</i>     | 1  | 203274858 | 19.57 | nonsynonymous SNV    | c.C124T      | p.L42F    | Driver    | COSM5714747 | Deleterious | Medium  |
| 65 | <i>BTG2</i>     | 1  | 203276264 | 34.76 | nonsynonymous SNV    | c.C175T      | p.P59S    | Driver    | .           | Deleterious | Medium  |
| 65 | <i>BTG2</i>     | 1  | 203276434 | 12.81 | nonsynonymous SNV    | c.G345C      | p.E115D   | Driver    | .           | Deleterious | Medium  |
| 65 | <i>SETD2</i>    | 3  | 47164447  | 5.85  | nonsynonymous SNV    | c.C1679T     | p.S560L   | Driver    | COSM1495563 | Deleterious | Medium  |
| 65 | <i>SETD2</i>    | 3  | 47164451  | 5.85  | nonsynonymous SNV    | c.C1675G     | p.L559V   | Passenger | .           | Tolerated   | Low     |
| 65 | <i>HIST1H1E</i> | 6  | 26156811  | 16.98 | nonsynonymous SNV    | c.G193C      | p.A65P    | Driver    | COSM145482  | Deleterious | Medium  |
| 65 | <i>HIST1H1E</i> | 6  | 26156840  | 16.05 | nonsynonymous SNV    | c.G222C      | p.E74D    | Passenger | .           | Tolerated   | Neutral |
| 65 | <i>HIST1H1E</i> | 6  | 26156985  | 18.83 | nonsynonymous SNV    | c.G367A      | p.A123T   | Passenger | .           | Tolerated   | Low     |
| 65 | <i>HIST1H1E</i> | 6  | 26157183  | 19.18 | nonsynonymous SNV    | c.G565C      | p.A189P   | Driver    | .           | Tolerated   | Medium  |
| 65 | <i>PIM1</i>     | 6  | 37138254  | 20.63 | nonsynonymous SNV    | c.G176C      | p.S59T    | Passenger | .           | .           | Neutral |

|    |                |    |          |       |                     |              |          |           |             |             |         |
|----|----------------|----|----------|-------|---------------------|--------------|----------|-----------|-------------|-------------|---------|
| 65 | <i>PIM1</i>    | 6  | 37138345 | 19.39 | nonsynonymous SNV   | c.G267C      | p.E89D   | Passenger | .           | .           | Neutral |
| 65 | <i>PIM1</i>    | 6  | 37138354 | 36.91 | nonsynonymous SNV   | c.G276A      | p.M92I   | Driver    | COSM5656321 | Deleterious | Neutral |
| 65 | <i>PIM1</i>    | 6  | 37138563 | 18.64 | nonsynonymous SNV   | c.C370T      | p.P124S  | Driver    | COSM3076476 | Tolerated   | Neutral |
| 65 | <i>PIM1</i>    | 6  | 37138599 | 19.25 | nonsynonymous SNV   | c.G406T      | p.G136C  | Driver    | .           | Deleterious | High    |
| 65 | <i>TMEM30A</i> | 6  | 75965985 | 19.13 | stopgain            | c.C919T      | p.R307X  | Driver    | COSM5949563 | .           | .       |
| 65 | <i>CARD11</i>  | 7  | 2983886  | 31.39 | nonsynonymous SNV   | c.A644T      | p.K215M  | Driver    | COSM1089012 | Deleterious | Medium  |
| 65 | <i>KMT2D</i>   | 12 | 49431880 | 30.6  | nonsynonymous SNV   | c.C9259T     | p.R3087W | Driver    | COSM1257782 | Deleterious | Low     |
| 65 | <i>KMT2D</i>   | 12 | 49435761 | 11.37 | nonsynonymous SNV   | c.G6122A     | p.R2041H | Driver    | COSM240688  | Deleterious | Low     |
| 65 | <i>KMT2D</i>   | 12 | 49446763 | 35.63 | stopgain            | c.T1047A     | p.C349X  | Driver    | .           | .           | .       |
| 65 | <i>BTG1</i>    | 12 | 92537944 | 16.17 | nonsynonymous SNV   | c.T428C      | p.V143A  | Passenger | .           | Tolerated   | Low     |
| 65 | <i>BTG1</i>    | 12 | 92539176 | 13.62 | nonsynonymous SNV   | c.G136C      | p.E46Q   | Passenger | .           | Tolerated   | Low     |
| 65 | <i>FOXO1</i>   | 13 | 41239894 | 18.77 | nonsynonymous SNV   | c.C456G      | p.S152R  | Passenger | .           | Deleterious | Low     |
| 65 | <i>FOXO1</i>   | 13 | 41240135 | 20.59 | nonsynonymous SNV   | c.G215C      | p.S72T   | Passenger | .           | Tolerated   | Neutral |
| 65 | <i>SOCS1</i>   | 16 | 11348743 | 14.7  | nonsynonymous SNV   | c.C593G      | p.P198R  | Passenger | .           | Tolerated   | Low     |
| 65 | <i>SOCS1</i>   | 16 | 11348791 | 19.72 | nonsynonymous SNV   | c.T545G      | p.I182S  | Driver    | .           | Deleterious | Medium  |
| 65 | <i>SOCS1</i>   | 16 | 11348972 | 15.82 | nonsynonymous SNV   | c.G364A      | p.G122R  | Driver    | COSM6204584 | Deleterious | Low     |
| 65 | <i>SOCS1</i>   | 16 | 11349040 | 22.42 | frameshift deletion | c.295_296del | p.G99fs  | Driver    | COSM5576345 | .           | .       |
| 65 | <i>SOCS1</i>   | 16 | 11349096 | 22.41 | stopgain            | c.C240A      | p.Y80X   | Driver    | COSM36135   | .           | .       |
| 65 | <i>SOCS1</i>   | 16 | 11349097 | 22.88 | nonsynonymous SNV   | c.A239G      | p.Y80C   | Driver    | .           | Deleterious | High    |
| 65 | <i>IRF8</i>    | 16 | 85942651 | 4.83  | nonsynonymous SNV   | c.C230T      | p.T77I   | Driver    | .           | Deleterious | Medium  |
| 65 | <i>STAT3</i>   | 17 | 40474474 | 18.99 | nonsynonymous SNV   | c.C1927A     | p.Q643K  | Driver    | COSM4381079 | Tolerated   | Neutral |
| 65 | <i>CD79B</i>   | 17 | 62007590 | 24.5  | nonsynonymous SNV   | c.G277C      | p.E93Q   | Passenger | .           | Tolerated   | Low     |

|    |        |    |           |       |                      |            |           |           |             |             |         |
|----|--------|----|-----------|-------|----------------------|------------|-----------|-----------|-------------|-------------|---------|
| 65 | GNA13  | 17 | 63052533  | 21.2  | nonsynonymous SNV    | c.G179A    | p.G60D    | Driver    | .           | Deleterious | High    |
| 65 | GNA13  | 17 | 63052633  | 21.28 | stopgain             | c.C79T     | p.Q27X    | Driver    | COSM982995  | .           | .       |
| 65 | BCL2   | 18 | 60985329  | 20    | nonsynonymous SNV    | c.G571A    | p.D191N   | Passenger | .           | Deleterious | Low     |
| 65 | BCL2   | 18 | 60985514  | 19.06 | nonsynonymous SNV    | c.G386A    | p.R129H   | Driver    | COSM220813  | Deleterious | Medium  |
| 65 | BCL2   | 18 | 60985530  | 18.68 | nonsynonymous SNV    | c.T370C    | p.F124L   | Driver    | COSM6212919 | Tolerated   | Neutral |
| 65 | BCL2   | 18 | 60985542  | 18.79 | nonsynonymous SNV    | c.C358T    | p.H120Y   | Driver    | COSM5715145 | Deleterious | Low     |
| 65 | BCL2   | 18 | 60985562  | 16.8  | nonsynonymous SNV    | c.C338G    | p.A113G   | Driver    | COSM3357021 | Deleterious | Neutral |
| 65 | BCL2   | 18 | 60985635  | 10.36 | nonsynonymous SNV    | c.G265A    | p.V89M    | Passenger | .           | Deleterious | Low     |
| 65 | BCL2   | 18 | 60985639  | 10.86 | nonsynonymous SNV    | c.C261G    | p.S87R    | Driver    | COSM220916  | Tolerated   | Neutral |
| 65 | BCL2   | 18 | 60985644  | 11.9  | nonsynonymous SNV    | c.C256G    | p.L86V    | Driver    | COSM2881858 | Tolerated   | Neutral |
| 65 | BCL2   | 18 | 60985700  | 19.9  | nonsynonymous SNV    | c.C200T    | p.A67V    | Passenger | .           | Tolerated   | Low     |
| 65 | BCL2   | 18 | 60985704  | 19.8  | nonsynonymous SNV    | c.G196T    | p.V66F    | Driver    | COSM220903  | Tolerated   | Neutral |
| 65 | BCL2   | 18 | 60985706  | 20.5  | nonsynonymous SNV    | c.C194T    | p.P65L    | Passenger | .           | Tolerated   | Neutral |
| 65 | BCL2   | 18 | 60985721  | 21.29 | nonsynonymous SNV    | c.C179T    | p.A60V    | Driver    | COSM220803  | Tolerated   | Low     |
| 65 | BCL2   | 18 | 60985724  | 21.57 | nonsynonymous SNV    | c.C176T    | p.P59L    | Driver    | COSM220815  | Tolerated   | Neutral |
| 65 | CD70   | 19 | 6590137   | 25.69 | nonsynonymous SNV    | c.C173T    | p.A58V    | Driver    | .           | Deleterious | Medium  |
| 65 | CD70   | 19 | 6590138   | 30    | nonsynonymous SNV    | c.G172A    | p.A58T    | Driver    | .           | Deleterious | Medium  |
| 65 | BTK    | X  | 100629530 | 22.22 | nonsynonymous SNV    | c.G234T    | p.Q78H    | Passenger | .           | Deleterious | Low     |
| 68 | ARID1A | 1  | 27023873  | 27.69 | stopgain             | c.A979T    | p.K327X   | Driver    | .           | .           | .       |
| 68 | BCL10  | 1  | 85733491  | 20.11 | stopgain             | c.T521A    | p.L174X   | Driver    | .           | .           | .       |
| 68 | NOTCH2 | 1  | 120458665 | 23.58 | frameshift insertion | c.6679dupC | p.H2227fs | Driver    | .           | .           | .       |
| 68 | BTG2   | 1  | 203274817 | 24.78 | nonsynonymous SNV    | c.G83A     | p.G28D    | Driver    | COSM5946364 | Tolerated   | Medium  |

|    |         |    |           |       |                      |                |           |               |           |             |             |         |
|----|---------|----|-----------|-------|----------------------|----------------|-----------|---------------|-----------|-------------|-------------|---------|
| 68 | MYD88   | 3  | 38182292  | 29.85 | nonsynonymous SNV    | c.G728A        | p.S243N   |               | Driver    | COSM3927375 | Deleterious | .       |
| 68 | PIM1    | 6  | 37138924  | 22.88 | nonsynonymous SNV    | c.G537A        | p.M179I   |               | Passenger | .           | Deleterious | Neutral |
| 68 | TNFAIP3 | 6  | 138201320 | 26.53 | stopgain             | c.C2019A       | p.Y673X   |               | Driver    | .           | .           | .       |
| 68 | KMT2D   | 12 | 49420214  | 24.27 | nonsynonymous SNV    | c.C15535T      | p.R5179C  |               | Driver    | COSM5704466 | Deleterious | Medium  |
| 68 | KMT2D   | 12 | 49427113  | 22.64 | frameshift deletion  | c.11375delC    | p.P3792fs |               | Driver    | .           | .           | .       |
| 68 | KMT2D   | 12 | 49440429  | 27.64 | frameshift insertion | c.4380dupA     | p.L1461fs |               | Driver    | .           | .           | .       |
| 68 | KMT2D   | 12 | 49440446  | 27.92 | nonsynonymous SNV    | c.A4364T       | p.Y1455F  |               | Passenger | .           | Deleterious | Low     |
| 68 | CREBBP  | 16 | 3794922   | 16.05 | stopgain             | c.C3955T       | p.R1319X  |               | Driver    | COSM4848624 | .           | .       |
| 68 | PRKCB   | 16 | 24226003  | 18.93 | nonsynonymous SNV    | c.G1888A       | p.D630N   |               | Driver    | COSM5650924 | Deleterious | .       |
| 68 | XBP1    | 22 | 29196469  | 51.77 | nonsynonymous SNV    | c.C44T         | p.P15L    |               | Driver    | .           | Deleterious | Medium  |
| 68 | BTK     | X  | 100617642 | 21.14 | nonsynonymous SNV    | c.C427A        | p.H143N   |               | Driver    | .           | Deleterious | Medium  |
| 70 | PIM1    | 6  | 37138352  | 16.87 | nonsynonymous SNV    | c.A274G        | p.M92V    | Only Ampliseq | Passenger | .           | Tolerated   | Neutral |
| 70 | CARD11  | 7  | 2983885   | 14.88 | nonsynonymous SNV    | c.G645T        | p.K215N   | Only Ampliseq | Driver    | COSM85974   | .           | medium  |
| 70 | TNFAIP3 | 6  | 138192659 | 13    | splicesite deletion  | c.295_295+8del | p.?       | Only Ampliseq | Driver    | .           | .           | .       |
| 71 | TET2    | 4  | 106158349 | 6.60  | stopgain             | c.C3250T       | p.Q1084X  |               | Driver    | .           | .           | .       |
| 71 | IRF4    | 6  | 393187    | 34.70 | nonsynonymous SNV    | c.T35G         | p.F12C    | Verified      | Passenger | .           | Tolerated   | Neutral |
| 71 | IRF4    | 6  | 393190    | 35.20 | nonsynonymous SNV    | c.G38C         | p.G13A    | Verified      | Passenger | .           | Deleterious | Low     |
| 71 | IRF4    | 6  | 393208    | 34.70 | nonsynonymous SNV    | c.G56T         | p.C19F    | Verified      | Driver    | .           | Deleterious | Medium  |
| 71 | IRF4    | 6  | 393252    | 24.00 | nonsynonymous SNV    | c.A100G        | p.S34G    | Verified      | Driver    | .           | Deleterious | Medium  |
| 71 | IRF4    | 6  | 393260    | 35.30 | nonsynonymous SNV    | c.G108T        | p.K36N    | Verified      | Passenger | .           | Tolerated   | Low     |
| 71 | IRF4    | 6  | 393295    | 24.20 | nonsynonymous SNV    | c.G143A        | p.S48N    | Verified      | Passenger | .           | Deleterious | Neutral |
| 71 | IRF4    | 6  | 393332    | 32.80 | nonsynonymous SNV    | c.G180C        | p.Q60H    | Verified      | Driver    | COSM220750  | Deleterious | Neutral |

|    |                |    |           |       |                        |                  |                |          |           |             |             |         |
|----|----------------|----|-----------|-------|------------------------|------------------|----------------|----------|-----------|-------------|-------------|---------|
| 71 | <i>IRF4</i>    | 6  | 393342    | 31.10 | nonsynonymous SNV      | c.C190T          | p.R64C         | Verified | Passenger | .           | Deleterious | Low     |
| 71 | <i>PRDM1</i>   | 6  | 106547182 | 38.10 | frameshift deletion    | c.419delC        | p.S140fs       | Verified | Driver    | .           | .           | .       |
| 71 | <i>KMT2D</i>   | 12 | 49425350  | 48.40 | nonsynonymous SNV      | c.C13138A        | p.P4380T       |          | Passenger | .           | Deleterious | Neutral |
| 71 | <i>B2M</i>     | 15 | 45003747  | 7.60  | nonsynonymous SNV      | c.G3T            | p.M1I          |          | Driver    | COSM4055093 | Deleterious | .       |
| 71 | <i>B2M</i>     | 15 | 45007691  | 30.60 | stopgain               | c.T138G          | p.Y46X         |          | Driver    | .           | .           | .       |
| 71 | <i>B2M</i>     | 15 | 45007811  | 8.40  | stopgain               | c.C258G          | p.Y86X         |          | Driver    | COSM144532  | .           | .       |
| 71 | <i>CIITA</i>   | 16 | 11000810  | 43.30 | nonsynonymous SNV      | c.C1461G         | p.I487M        |          | Driver    | COSM3887868 | Tolerated   | Medium  |
| 72 | <i>MYD88</i>   | 3  | 38181433  | 90.40 | nonsynonymous SNV      | c.G446A          | p.S149N        |          | Driver    | COSM85949   | Deleterious | Medium  |
| 72 | <i>TBL1XR1</i> | 3  | 176750839 | 41.40 | nonsynonymous SNV      | c.T1336A         | p.Y446N        |          | Driver    | COSM4440704 | Deleterious | Neutral |
| 72 | <i>NOTCH1</i>  | 9  | 139389621 | 47.10 | UTR3                   |                  |                |          | Driver    | .           | .           | .       |
| 72 | <i>KMT2D</i>   | 12 | 49427266  | 14.60 | nonframeshift deletion | c.11220_11222del | p.3740_3741del |          | Driver    | COSM5160496 | .           | .       |
| 72 | <i>BTG1</i>    | 12 | 92538182  | 41.60 | nonsynonymous SNV      | c.G190A          | p.G64R         |          | Driver    | .           | Deleterious | Medium  |
| 72 | <i>BTG1</i>    | 12 | 92539244  | 42.70 | nonsynonymous SNV      | c.C68T           | p.S23F         |          | Driver    | .           | Tolerated   | Medium  |
| 72 | <i>PRKCB</i>   | 16 | 24226078  | 29.50 | nonsynonymous SNV      | c.G1963A         | p.E655K        |          | Driver    | .           | Deleterious | .       |
| 73 | <i>MYD88</i>   | 3  | 38182641  | 78.00 | nonsynonymous SNV      | c.T794C          | p.L265P        | Verified | Driver    | COSM85940   | Deleterious | .       |
| 73 | <i>TBL1XR1</i> | 3  | 176750838 | 68.90 | nonsynonymous SNV      | c.A1337G         | p.Y446C        |          | Passenger | .           | Deleterious | Low     |
| 73 | <i>TET2</i>    | 4  | 106156981 | 6.00  | stopgain               | c.G1882T         | p.E628X        |          | Driver    | COSM1309587 | .           | .       |
| 73 | <i>PIM1</i>    | 6  | 37138802  | 32.80 | nonsynonymous SNV      | c.G508A          | p.E170K        | Verified | Driver    | COSM4610152 | Tolerated   | Neutral |
| 73 | <i>PRDM1</i>   | 6  | 106534471 | 51.40 | splicing               |                  |                | Verified | Driver    | .           | .           | .       |
| 73 | <i>PRDM1</i>   | 6  | 106554273 | 49.30 | nonsynonymous SNV      | c.C1801T         | p.R601W        | Verified | Driver    | .           | Deleterious | Medium  |
| 73 | <i>SGK1</i>    | 6  | 134495151 | 27.10 | frameshift deletion    | c.490_505del     | p.M164fs       |          | Driver    | .           | .           | .       |
| 73 | <i>TCF3</i>    | 19 | 1615767   | 50.80 | nonsynonymous SNV      | c.A1504G         | p.K502E        |          | Driver    | COSM4944323 | Tolerated   | Low     |

|    |               |    |           |       |                        |              |            |          |           |             |             |         |
|----|---------------|----|-----------|-------|------------------------|--------------|------------|----------|-----------|-------------|-------------|---------|
| 73 | <i>DDX3X</i>  | X  | 41205861  | 33.40 | nonsynonymous SNV      | c.G1601A     | p.R534H    |          | Driver    | COSM302036  | Deleterious | High    |
| 74 | <i>ID3</i>    | 1  | 23885655  | 26.80 | nonsynonymous SNV      | c.C263A      | p.A88D     |          | Passenger | .           | Tolerated   | Low     |
| 74 | <i>MYD88</i>  | 3  | 38182641  | 50.40 | stoploss               | c.T794C      | p.L265P    | Verified | Driver    | COSM85940   | Deleterious | .       |
| 74 | <i>KLHL6</i>  | 3  | 183273193 | 36.60 | nonsynonymous SNV      | c.C249G      | p.F83L     |          | Driver    | .           | Deleterious | Medium  |
| 74 | <i>KLHL6</i>  | 3  | 183273257 | 38.30 | nonsynonymous SNV      | c.T185C      | p.L62P     |          | Driver    | .           | Deleterious | High    |
| 74 | <i>PIM1</i>   | 6  | 37138369  | 37.00 | nonframeshift deletion | c.291_296del | p.97_99del | Verified | Driver    | .           | .           | .       |
| 74 | <i>PIM1</i>   | 6  | 37138549  | 41.90 | nonsynonymous SNV      | c.G356A      | p.G119D    |          | Driver    | COSM1581462 | Deleterious | Neutral |
| 74 | <i>PIM1</i>   | 6  | 37138563  | 40.50 | nonsynonymous SNV      | c.C370A      | p.P124T    | Verified | Driver    | COSM3076476 | Tolerated   | Neutral |
| 74 | <i>PIM1</i>   | 6  | 37138808  | 41.40 | splicing               |              |            | Verified | Driver    | .           | .           | .       |
| 74 | <i>PIM1</i>   | 6  | 37139063  | 20.80 | nonsynonymous SNV      | c.G676C      | p.E226Q    | Verified | Driver    | COSM1161628 | Deleterious | Neutral |
| 74 | <i>PIM1</i>   | 6  | 37139247  | 7.80  | nonsynonymous SNV      | c.C860T      | p.T287I    | Verified | Passenger | .           | Deleterious | Low     |
| 74 | <i>KMT2D</i>  | 12 | 49425644  | 75.10 | stopgain               | c.C12844T    | p.R4282X   |          | Driver    | COSM3461536 | .           | .       |
| 74 | <i>CREBBP</i> | 16 | 3828740   | 5.90  | nonsynonymous SNV      | c.G1902T     | p.K634N    |          | Passenger | .           | Deleterious | Low     |
| 74 | <i>SOCS1</i>  | 16 | 11348908  | 34.00 | nonsynonymous SNV      | c.G428A      | p.S143N    |          | Passenger | .           | Tolerated   | Low     |

Chr- chromosome, \* Only for cases uniquely analysed by AmpliSeq technology; VAF: variant allelic frequency; AA: aminoacid

**Supplemental Table 6.** aSHM patterns in frequently mutated genes (>2 cases) affected with more than 1.5 mutation per case

| Gene name       | Total SNV | Mutated cases | Mutations/case | Variants within 2kb# from TSS (percentage) | Transition over transversions (expected 0.33) | AID motif* (percentage) |
|-----------------|-----------|---------------|----------------|--------------------------------------------|-----------------------------------------------|-------------------------|
| <i>PIM1</i>     | 76        | 25            | 3,04           | 75 (0.99)                                  | 0,95                                          | 47 (0.62)               |
| <i>IRF4</i>     | 30        | 9             | 3,33           | 30 (1.00)                                  | 0,50                                          | 18 (0.60)               |
| <i>BCL2</i>     | 26        | 8             | 3,25           | 26 (1.00)                                  | 1,60                                          | 9 (0.35)                |
| <i>BTG2</i>     | 24        | 12            | 2,00           | 21 (0.88)                                  | 1,40                                          | 14 (0.67)               |
| <i>HIST1H1E</i> | 23        | 13            | 1,77           | 23 (1.00)                                  | 0,92                                          | 13 (0.57)               |
| <i>SOCS1</i>    | 18        | 8             | 2,25           | 18 (1.00)                                  | 0,64                                          | 8 (0.44)                |
| <i>BTG1</i>     | 16        | 10            | 1,60           | 16 (1.00)                                  | 1,29                                          | 7 (0.44)                |
| <i>MYC</i>      | 11        | 6             | 1,83           | 9 (0.82)                                   | 0,83                                          | 4 (0.44)                |

\*AID motifs including WATW/WRCY/RGYW/WGCW

# 2kb after 150bp from TSS

**Supplemental Table 7.** Clinical features in the 3 groups of DLBL-AE

| Parameter                             | Group 1         | Group 2       | Group 3       |   |
|---------------------------------------|-----------------|---------------|---------------|---|
| <b>Mean age (range)</b>               | 70<br>(38-84)   | 67<br>(37-85) | 68<br>(44-87) |   |
| <b>M:F</b>                            | 7:6             | 3:8           | 9:17          |   |
| <b>Died of disease (%)</b>            | 1/7*; 14%       | 2/9; 22%      | 7/21; 33%     |   |
| <b>total driver mutations</b>         | 73              | 96            | 220           |   |
| <b>Mean driver mutations/ case</b>    | 5.5             | 10.7          | 8.84          |   |
| <b>Nodal: extranodal localization</b> | 4:9             | 5:6           | 12:14         |   |
| <b>Extranodal localization</b>        | Waldeyer's ring | 4             | 2             | 3 |
|                                       | GI tract        | 1             | 3             | 3 |
|                                       | Other           | 4             | 1             | 8 |

\*The patient died of other cause

**Supplemental Table 8.** List of copy number (CN) and copy number neutral loss-of-heterozygosity (CNN-LOH) detected in 9 cases with *IRF4* rearrangement

| Case | Chromosome Region            | Event                | Length    | Cytoband        |
|------|------------------------------|----------------------|-----------|-----------------|
| 2    | chr1:145,394,955-176,433,750 | CN Gain              | 31038796  | q21.1 - q25.2   |
| 2    | chr2:1-243,199,373           | CN Gain              | 243199373 | p25.3 - q37.3   |
| 2    | chr2:1-243,199,373           | CNN-LOH              | 243199373 | p25.3 - q37.3   |
| 2    | chr3:100,295,624-198,022,430 | CNN-LOH              | 97726807  | q12.2 - q29     |
| 2    | chr6:27,879,982-34,513,731   | CNN-LOH              | 6633750   | p22.1 - p21.31  |
| 2    | chr7:1-159,138,663           | CN Gain              | 159138663 | p22.3 - q36.3   |
| 2    | chr11:46,231,502-51,575,951  | CNN-LOH              | 5344450   | p11.2 - p11.12  |
| 2    | chr16:1-90,354,753           | CN Gain              | 90354753  | p13.3 - q24.3   |
| 2    | chr17:5,134,814-22,217,883   | CN Loss              | 17083070  | p13.2 - p11.1   |
| 2    | chr17:33,433,487-36,131,437  | CN Gain              | 2697951   | q12             |
| 2    | chr17:51,340,859-57,700,581  | CN Gain              | 6359723   | q22 - q23.1     |
| 2    | chr18:60,972,718-78,007,784  | CN Gain              | 17035067  | q21.33 - q23    |
| 2    | chr19:32,441,437-40,811,700  | CN Gain              | 8370264   | q13.11 - q13.2  |
| 2    | chr19:44,906,110-52,301,860  | CN Gain              | 7395751   | q13.31 - q13.41 |
| 2    | chr19:54,111,610-59,093,239  | CN Gain              | 4981630   | q13.42 - q13.43 |
| 5    | chr7:61,064,518-67,097,366   | CNN-LOH              | 6032849   | q11.1 - q11.22  |
| 16   | chr1:145,675,931-249,212,878 | CN Gain              | 103536948 | q21.1 - q44     |
| 16   | chr3:63,411-81,293,080       | CNN-LOH              | 81229670  | p26.3 - p12.2   |
| 16   | chr3:60,357,822-60,733,152   | Homozygous Copy Loss | 375331    | p14.2           |
| 16   | chr3:60,753,662-65,744,236   | CN Loss              | 4990575   | p14.2 - p14.1   |
| 16   | chr3:81,107,048-197,852,564  | CN Gain              | 116745517 | p12.2 - q29     |
| 16   | chr4:31,581,408-32,187,861   | CN Loss              | 606454    | p15.1           |
| 16   | chr4:63,814,158-64,161,946   | CN Loss              | 347789    | q13.1           |
| 16   | chr4:68,358,331-68,635,072   | CN Loss              | 276742    | q13.2           |
| 16   | chr4:133,772,987-134,113,822 | CN Loss              | 340836    | q28.3           |
| 16   | chr5:29,171,031-29,482,956   | CN Loss              | 311926    | p13.3           |
| 16   | chr5:130,399,290-130,692,045 | CN Gain              | 292756    | q23.3 - q31.1   |
| 16   | chr5:176,555,523-177,093,058 | CN Loss              | 537536    | q35.2 - q35.3   |
| 16   | chr6:204,909-36,732,431      | CNN-LOH              | 36527523  | p25.3 - p21.2   |
| 16   | chr7:110,440,775-110,855,600 | CN Loss              | 414826    | q31.1           |
| 16   | chr8:59,753,928-60,041,634   | Homozygous Copy Loss | 287707    | q12.1           |
| 16   | chr9:204,738-21,853,221      | CN Gain              | 21648484  | p24.3 - p21.3   |
| 16   | chr9:21,856,470-22,000,841   | Homozygous Copy Loss | 144372    | p21.3           |
| 16   | chr9:22,081,850-141,054,761  | CN Gain              | 118972912 | p21.3 - q34.3   |
| 16   | chr9:70,984,372-141,054,761  | CNN-LOH              | 70070390  | q21.11 - q34.3  |
| 16   | chr11:32,199,488-41,154,796  | High Copy Gain       | 8955309   | p13 - p12       |
| 16   | chr12:189,400-133,818,115    | CNN-LOH              | 133628716 | p13.33 - q24.33 |



|    |                               |                      |           |                 |
|----|-------------------------------|----------------------|-----------|-----------------|
| 16 | chr12:112,893,995-119,012,658 | CN Loss              | 6118664   | q24.13 - q24.23 |
| 16 | chr13:54,581,087-54,979,022   | CN Loss              | 397936    | q14.3           |
| 16 | chr13:89,714,311-91,115,213   | CN Loss              | 1400903   | q31.2 - q31.3   |
| 16 | chr14:80,843,527-81,704,787   | CN Gain              | 861261    | q31.1           |
| 16 | chr17:400,959-21,516,719      | CN Loss              | 21115761  | p13.3 - p11.2   |
| 16 | chr17:73,185,657-73,452,956   | CN Loss              | 267300    | q25.1           |
| 16 | chr18:12,842-15,377,471       | CN Loss              | 15364630  | p11.32 - p11.21 |
| 16 | chr18:18,554,307-78,007,784   | CN Gain              | 59453478  | q11.1 - q23     |
| 16 | chr19:4,159,873-4,424,296     | CN Loss              | 264424    | p13.3           |
| 16 | chr19:37,088,965-37,353,791   | Homozygous Copy Loss | 264827    | q13.12          |
| 16 | chr20:69,094-62,912,463       | CN Gain              | 62843370  | p13 - q13.33    |
| 16 | chrX:177,942-155,219,364      | CN Loss              | 155041423 | p22.33 - q28    |
| 31 | chr11:45,839,889-51,575,951   | CNN-LOH              | 5736063   | p11.2 - p11.12  |
| 31 | chr22:23,096,298-51,213,826   | CNN-LOH              | 28117529  | q11.22 - q13.33 |
| 44 | chr1:187,882,589-188,836,200  | CN Loss              | 953612    | q31.1           |
| 44 | chr4:69,404-48,229,961        | CN Loss              | 48160558  | p16.3 - p11     |
| 44 | chr6:528,776-8,269,304        | CN Loss              | 7740529   | p25.3 - p24.3   |
| 44 | chr6:65,503,314-170,913,051   | CN Loss              | 105409738 | q12 - q27       |
| 44 | chr9:1-39,220,226             | CN Gain              | 39220226  | p24.3 - p13.1   |
| 44 | chr17:400,959-18,928,388      | CN Loss              | 18527430  | p13.3 - p11.2   |
| 44 | chr17:19,144,055-21,369,629   | CN Gain              | 2225575   | p11.2           |
| 44 | chrX:177,942-155,219,364      | CN Loss              | 155041423 | p22.33 - q28    |
| 71 | chr1:754,192-121,350,934      | CN Loss              | 120596743 | p36.33 - p11.2  |
| 71 | chr4:182,572,102-190,915,650  | CNN-LOH              | 8343549   | q34.3 - q35.2   |
| 71 | chr6:93,956,769-159,703,212   | CN Loss              | 65746444  | q16.1 - q25.3   |
| 71 | chr8:104,226,946-111,457,175  | CNN-LOH              | 7230230   | q22.3 - q23.2   |
| 71 | chr9:80,087,031-86,179,563    | CNN-LOH              | 6092533   | q21.2 - q21.32  |
| 71 | chr10:126,070-39,146,676      | CN Gain              | 39020607  | p15.3 - p11.1   |
| 71 | chr11:192,764-128,381,867     | CN Gain              | 128189104 | p15.5 - q24.3   |
| 71 | chr11:128,383,077-128,691,976 | High Copy Gain       | 308900    | q24.3           |
| 71 | chr11:128,701,541-134,938,847 | CN Gain              | 6237307   | q24.3 - q25     |
| 71 | chr15:20,161,372-102,397,317  | CN Loss              | 82235946  | q11.1 - q26.3   |
| 71 | chr16:30,098,380-35,271,725   | CNN-LOH              | 5173346   | p11.2 - p11.1   |
| 71 | chr16:64,920,476-81,492,311   | CNN-LOH              | 16571836  | q21 - q23.2     |
| 71 | chr17:3,838,626-16,564,034    | CN Loss              | 12725409  | p13.2 - p11.2   |
| 71 | chr17:17,103,251-18,529,604   | CN Loss              | 1426354   | p11.2           |
| 71 | chr19:247,232-19,720,028      | CNN-LOH              | 19472797  | p13.3 - p13.11  |
| 74 | chr1:140,581-106,783,257      | CN Loss              | 106642677 | p36.33 - p21.1  |
| 74 | chr1:109,633,873-110,220,509  | CN Loss              | 586637    | p13.3           |
| 74 | chr1:110,220,509-110,243,644  | CN Gain              | 23136     | p13.3           |
| 74 | chr1:110,243,644-110,482,602  | CN Loss              | 238959    | p13.3           |

|    |                              |                      |           |                 |
|----|------------------------------|----------------------|-----------|-----------------|
| 74 | chr1:110,482,602-114,486,104 | CN Gain              | 4003503   | p13.3 - p13.2   |
| 74 | chr1:114,486,104-114,837,707 | CN Loss              | 351604    | p13.2           |
| 74 | chr1:144,009,053-157,327,309 | CN Gain              | 13318257  | q21.1 - q23.1   |
| 74 | chr1:157,327,309-157,588,437 | High Copy Gain       | 261129    | q23.1           |
| 74 | chr1:157,588,437-249,250,621 | CN Gain              | 91662185  | q23.1 - q44     |
| 74 | chr2:196,831,575-198,635,696 | CN Loss              | 1804122   | q32.3 - q33.1   |
| 74 | chr2:204,701,555-205,001,007 | CN Loss              | 299453    | q33.2 - q33.3   |
| 74 | chr3:0-98,851,430            | CN Loss              | 98851431  | p26.3 - q12.1   |
| 74 | chr3:145,714,628-146,062,918 | CN Loss              | 348291    | q24             |
| 74 | chr4:40,186,491-40,501,675   | CN Loss              | 315185    | p14             |
| 74 | chr6:70,533,447-74,244,361   | CN Loss              | 3710915   | q13             |
| 74 | chr6:75,154,977-76,780,574   | CN Gain              | 1625598   | q13 - q14.1     |
| 74 | chr6:98,034,825-138,002,419  | CN Loss              | 39967595  | q16.1 - q23.3   |
| 74 | chr6:138,002,419-138,274,403 | Homozygous Copy Loss | 271985    | q23.3           |
| 74 | chr6:138,274,403-142,001,049 | CN Loss              | 3726647   | q23.3 - q24.1   |
| 74 | chr6:142,001,049-142,552,061 | Homozygous Copy Loss | 551013    | q24.1           |
| 74 | chr6:143,015,461-143,353,847 | CN Loss              | 338387    | q24.2           |
| 74 | chr6:153,859,319-162,757,491 | CN Loss              | 8898173   | q25.2 - q26     |
| 74 | chr7:0-51,590,934            | CN Loss              | 51590935  | p22.3 - p12.1   |
| 74 | chr7:61,064,518-159,138,663  | CN Gain              | 98074146  | q11.1 - q36.3   |
| 74 | chr8:0-146,364,022           | CN Loss              | 146364023 | p23.3 - q24.3   |
| 74 | chr9:0-21,891,986            | CN Gain              | 21891987  | p24.3 - p21.3   |
| 74 | chr9:0-37,365,379            | CNN-LOH              | 37365380  | p24.3 - p13.2   |
| 74 | chr9:21,891,986-22,012,492   | Homozygous Copy Loss | 120507    | p21.3           |
| 74 | chr9:22,012,492-34,301,995   | CN Gain              | 12289504  | p21.3 - p13.3   |
| 74 | chr9:35,926,415-39,184,065   | CN Gain              | 3257651   | p13.3 - p13.1   |
| 74 | chr9:70,984,372-141,213,431  | CN Loss              | 70229060  | q21.11 - q34.3  |
| 74 | chr10:0-32,948,751           | CN Loss              | 32948752  | p15.3 - p11.22  |
| 74 | chr10:32,948,751-33,476,293  | Homozygous Copy Loss | 527543    | p11.22          |
| 74 | chr10:33,476,293-35,080,290  | CN Loss              | 1603998   | p11.22 - p11.21 |
| 74 | chr10:35,064,740-63,149,124  | CNN-LOH              | 28084385  | p11.21 - q21.2  |
| 74 | chr10:42,413,322-135,534,747 | CN Gain              | 93121426  | q11.21 - q26.3  |
| 74 | chr11:90,512,808-91,174,005  | CN Loss              | 661198    | q14.3           |
| 74 | chr12:11,136,977-12,842,147  | CN Loss              | 1705171   | p13.2 - p13.1   |
| 74 | chr12:1-133,851,895          | CNN-LOH              | 133851895 | p13.33 - q24.33 |
| 74 | chr13:19,084,823-60,558,729  | CN Gain              | 41473907  | q11 - q21.2     |
| 74 | chr13:60,558,729-61,306,343  | High Copy Gain       | 747615    | q21.2           |
| 74 | chr13:61,306,343-79,514,951  | CN Gain              | 18208609  | q21.2 - q31.1   |
| 74 | chr13:56,412,495-100,637,717 | CNN-LOH              | 44225223  | q21.1 - q32.3   |
| 74 | chr13:79,514,951-80,144,014  | High Copy Gain       | 629064    | q31.1           |
| 74 | chr13:80,144,014-101,023,528 | CN Gain              | 20879515  | q31.1 - q32.3   |

|    |                               |                      |           |                |
|----|-------------------------------|----------------------|-----------|----------------|
| 74 | chr13:101,023,528-104,011,634 | CN Loss              | 2988107   | q32.3 - q33.1  |
| 74 | chr13:104,011,634-106,387,934 | CN Gain              | 2376301   | q33.1 - q33.2  |
| 74 | chr13:106,387,934-107,320,308 | CN Loss              | 932375    | q33.2 - q33.3  |
| 74 | chr13:107,320,308-107,678,410 | CN Gain              | 358103    | q33.3          |
| 74 | chr13:107,678,410-111,789,281 | CN Loss              | 4110872   | q33.3 - q34    |
| 74 | chr13:111,789,281-115,169,878 | CN Gain              | 3380598   | q34            |
| 74 | chr14:20,219,083-107,349,540  | CN Gain              | 87130458  | q11.2 - q32.33 |
| 74 | chr15:89,780,710-90,086,819   | CN Loss              | 306110    | q26.1          |
| 74 | chr16:0-90,354,753            | CN Gain              | 90354754  | p13.3 - q24.3  |
| 74 | chr17:0-21,603,693            | CN Loss              | 21603694  | p13.3 - p11.2  |
| 74 | chr17:27,941,137-29,200,720   | CN Loss              | 1259584   | q11.2          |
| 74 | chr17:42,446,027-44,002,799   | CN Loss              | 1556773   | q21.31         |
| 74 | chr18:18,554,307-27,624,058   | CN Loss              | 9069752   | q11.1 - q12.1  |
| 74 | chr18:67,752,845-69,712,964   | CN Loss              | 1960120   | q22.2 - q22.3  |
| 74 | chr18:69,712,964-78,077,248   | CN Gain              | 8364285   | q22.3 - q23    |
| 74 | chr19:0-1,583,231             | CN Loss              | 1583232   | p13.3          |
| 74 | chr19:8,510,720-12,995,553    | CN Loss              | 4484834   | p13.2          |
| 74 | chr19:22,589,586-24,544,320   | CN Loss              | 1954735   | p12 - p11      |
| 74 | chr19:30,364,057-30,940,077   | CN Loss              | 576021    | q12            |
| 74 | chr19:51,553,554-52,897,689   | CN Loss              | 1344136   | q13.41         |
| 74 | chr20:0-63,025,520            | CN Gain              | 63025521  | p13 - q13.33   |
| 74 | chr21:14,344,537-48,129,895   | CN Gain              | 33785359  | q11.2 - q22.3  |
| 74 | chr22:49,725,286-50,454,440   | CN Gain              | 729155    | q13.33         |
| 74 | chrX:0-15,609,078             | CN Gain              | 15609079  | p22.33 - p22.2 |
| 74 | chrX:25,693,457-31,231,247    | CN Gain              | 5537791   | p21.3 - p21.2  |
| 74 | chrX:38,464,767-45,884,910    | CN Gain              | 7420144   | p11.4 - p11.3  |
| 74 | chrX:47,041,752-155,270,560   | CN Loss              | 108228809 | p11.23 - q28   |
| 25 | chr1:0-168,019,990            | CN Loss              | 168019991 | p36.33 - q24.2 |
| 25 | chr1:172,085,453-189,163,409  | CN Loss              | 17077957  | q24.3 - q31.1  |
| 25 | chr1:190,282,598-191,369,857  | CN Loss              | 1087260   | q31.1 - q31.2  |
| 25 | chr2:0-55,546,833             | CN Loss              | 55546834  | p25.3 - p16.1  |
| 25 | chr2:60,251,230-60,497,414    | CN Gain              | 246185    | p16.1          |
| 25 | chr2:60,497,414-61,088,534    | High Copy Gain       | 591121    | p16.1          |
| 25 | chr2:61,088,534-62,624,190    | CN Gain              | 1535657   | p16.1 - p15    |
| 25 | chr2:62,624,190-89,131,881    | CN Loss              | 26507692  | p15 - p11.2    |
| 25 | chr2:89,131,697-89,726,591    | Homozygous Copy Loss | 594895    | p11.2          |
| 25 | chr2:95,429,197-95,704,804    | CN Gain              | 275608    | q11.1          |
| 25 | chr2:95,704,804-97,157,807    | High Copy Gain       | 1453004   | q11.1 - q11.2  |
| 25 | chr2:97,157,807-97,889,931    | CN Gain              | 732125    | q11.2          |
| 25 | chr2:97,889,931-243,199,373   | CN Loss              | 145309443 | q11.2 - q37.3  |
| 25 | chr3:0-198,022,430            | CN Loss              | 198022431 | p26.3 - q29    |

|    |                              |                      |           |                 |
|----|------------------------------|----------------------|-----------|-----------------|
| 25 | chr5:89,461,845-109,523,469  | CN Loss              | 20061625  | q14.3 - q21.3   |
| 25 | chr6:0-21,522,087            | CN Gain              | 21522088  | p25.3 - p22.3   |
| 25 | chr6:0-21,667,970            | CNN-LOH              | 21667971  | p25.3 - p22.3   |
| 25 | chr6:21,645,094-171,115,067  | CN Loss              | 149469974 | p22.3 - q27     |
| 25 | chr8:0-71,296,348            | CN Loss              | 71296349  | p23.3 - q13.3   |
| 25 | chr10:0-135,534,747          | CN Loss              | 135534748 | p15.3 - q26.3   |
| 25 | chr13:19,084,823-115,169,878 | CN Loss              | 96085056  | q11 - q34       |
| 25 | chr15:35,851,265-46,176,625  | CN Loss              | 10325361  | q14 - q21.1     |
| 25 | chr15:67,113,781-102,531,392 | CN Loss              | 35417612  | q22.31 - q26.3  |
| 25 | chr18:60,819,803-78,077,248  | CN Gain              | 17257446  | q21.33 - q23    |
| 25 | chr20:1-63,025,520           | CN Loss              | 63025520  | p13 - q13.33    |
| 26 | chr2:229,180,825-243,052,331 | CN Gain              | 13871507  | q36.3 - q37.3   |
| 26 | chr3:48,313,418-50,406,058   | CN Loss              | 2092641   | p21.31          |
| 26 | chr3:52,409,421-54,033,786   | CN Loss              | 1624366   | p21.1           |
| 26 | chr5:38,139-86,034,505       | CN Gain              | 85996367  | p15.33 - q14.3  |
| 26 | chr7:82,444,738-159,118,443  | CN Gain              | 76673706  | q21.11 - q36.3  |
| 26 | chr9:204,738-141,054,761     | CN Gain              | 140850024 | p24.3 - q34.3   |
| 26 | chr11:192,764-49,173,331     | High Copy Gain       | 48980568  | p15.5 - p11.12  |
| 26 | chr11:45,710,652-51,575,951  | CNN-LOH              | 5865300   | p11.2 - p11.12  |
| 26 | chr11:49,177,919-51,575,951  | CN Gain              | 2398033   | p11.12          |
| 26 | chr12:1-133,851,895          | CN Gain              | 133851895 | p13.33 - q24.33 |
| 26 | chr15:41,040,181-42,955,967  | CN Loss              | 1915787   | q15.1 - q15.2   |
| 26 | chr15:75,736,452-78,894,339  | CN Loss              | 3157888   | q24.2 - q25.1   |
| 26 | chr17:400,959-3,730,979      | CN Gain              | 3330021   | p13.3 - p13.2   |
| 26 | chr17:3,745,359-4,198,650    | Homozygous Copy Loss | 453292    | p13.2           |
| 26 | chr17:4,212,108-5,412,822    | CN Loss              | 1200715   | p13.2           |
| 26 | chr17:5,427,115-80,263,427   | CN Gain              | 74836313  | p13.2 - q25.3   |
| 26 | chr18:12,842-78,007,784      | CN Gain              | 77994943  | p11.32 - q23    |
| 26 | chr19:19,427,623-23,050,838  | High Copy Gain       | 3623216   | p13.11 - p12    |
| 26 | chr19:27,754,573-30,282,649  | High Copy Gain       | 2528077   | q11 - q12       |
| 26 | chr19:39,369,986-41,368,655  | High Copy Gain       | 1998670   | q13.2           |
| 26 | chr19:41,368,677-41,614,028  | CN Gain              | 245352    | q13.2           |
| 26 | chr21:14,344,537-48,097,610  | CN Gain              | 33753074  | q11.2 - q22.3   |
| 26 | chrX:177,942-55,600,744      | CN Loss              | 55422803  | p22.33 - p11.21 |
| 26 | chrX:55,623,725-64,926,522   | CN Gain              | 9302798   | p11.21 - q12    |
| 26 | chrX:64,932,776-155,219,364  | CN Loss              | 90286589  | q12 - q28       |

Case 25 has in addition a *BCL2* rearrangement

Case 26 has in addition a *BCL2* and a *BCL6* rearrangement

Supplemental Figure 1: Control group

| Case   | Age at diagnosis | Localization | Type<br>Hans | Mutations                  | GEP<br>COO* | FISH             |
|--------|------------------|--------------|--------------|----------------------------|-------------|------------------|
| CoGCB1 | 71               | spleen       | GCB          | <i>PIM1, TNFAIP3, EZH2</i> | GCB         | None             |
| CoGCB2 | 76               | LN cervical  | GCB          | <i>BCL2</i>                | GCB         | <i>BCL2</i>      |
| CoGCB3 | 74               | acromion     | GCB          | <i>BCL2</i>                | GCB         | <i>BCL2</i>      |
| CoGCB4 | 64               | LN cervical  | GCB          | <i>BCL2, EZH2</i>          | GCB         | <i>BCL2, MYC</i> |
| CoGCB5 | 68               | LN cervical  | GCB          | <i>BCL2</i>                | GCB         | <i>MYC</i>       |
| CoABC1 | 77               | testis       | ABC          | <i>MYD88, CARD11, PIM1</i> | ABC         | None             |
| CoABC2 | 76               | testis       | ABC          | <i>MYD88, PIM1</i>         | ABC         | None             |
| CoABC3 | 74               | ENT          | ABC          | <i>MYD88, PRDM1, PIM1</i>  | ABC         | None             |
| CoABC4 | 87               | LN cervical  | ABC          | <i>MYD88, CD79B</i>        | ABC         | None             |

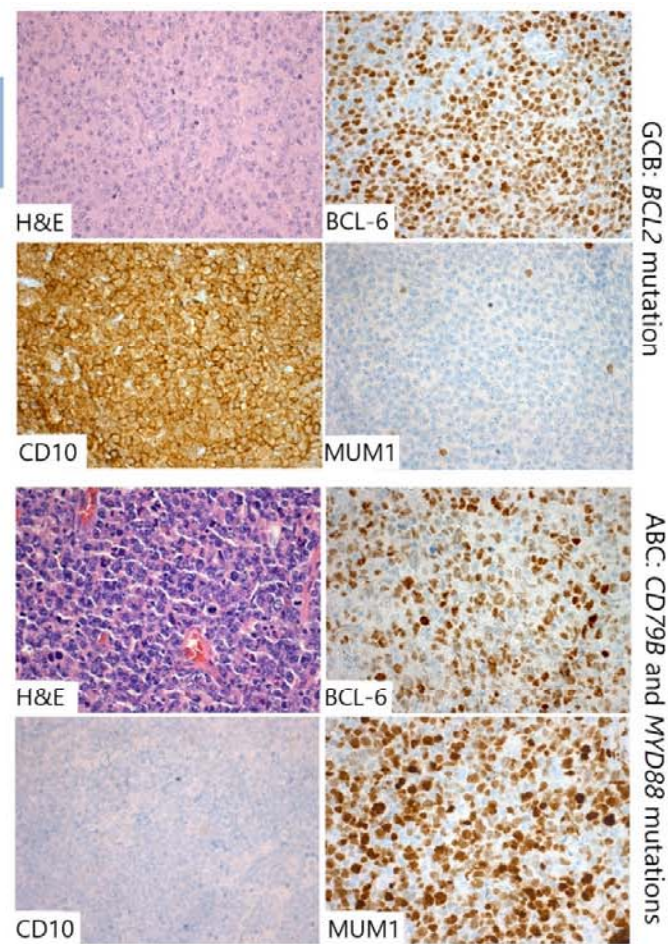

GEP: gene expression profile, FISH fluorescence in situ hybridization; GCB: germinal center B-cell; ABC: Activated B-cell; COO: cell of origin Co: Control.

**Supplemental Figure 2. Overall survival analysis of 46 cases of DLBCL-AE.**

Survival analysis (Kaplan Meier estimator) of DLBCL-AE in adults divided by FISH group 1-3. The difference in the overall survival is not significant ( $P=0.065$ ). Below, the risk table with patients at risk and cumulative events per group. Group 1, DLBCL-AE without rearrangements, Group 2, DLBCL-AE-*IRF4* and Group 3: DLBCL-AE with *BCL2/BCL6/MYC/IGH* rearrangements. Survival analysis and plotting was performed with R version 4.0.5 (R Core Team, 2021) using Survminer package (Kassambara A., 2021)

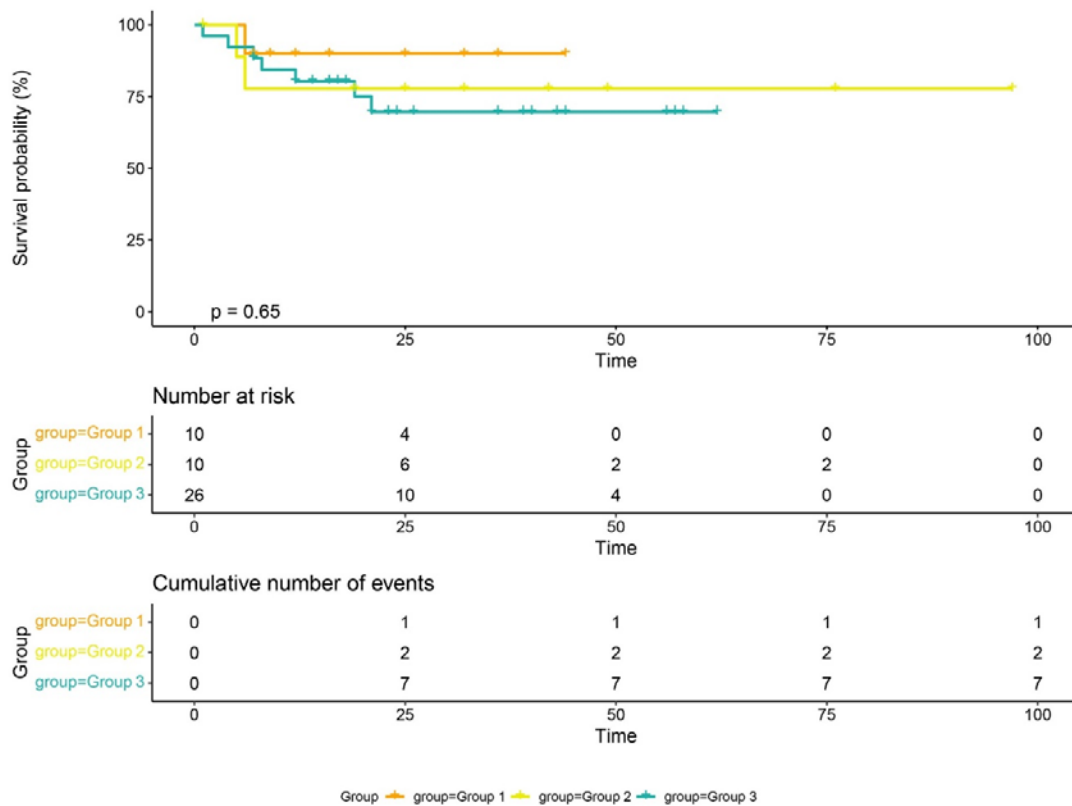

**Supplemental Figure 3. Correlation analysis of clinical and/or molecular features in 50 cases of DLBCL-AE**

**A)** Correlation analysis including cluster groups, clinical and pathological features (age, male gender, morphology, extranodal involvement), COO, genetic rearrangements and mutations in more than 4 cases. **B)** Correlation analysis including cluster groups, COO, genetic rearrangements and mutations in more than 4 cases.

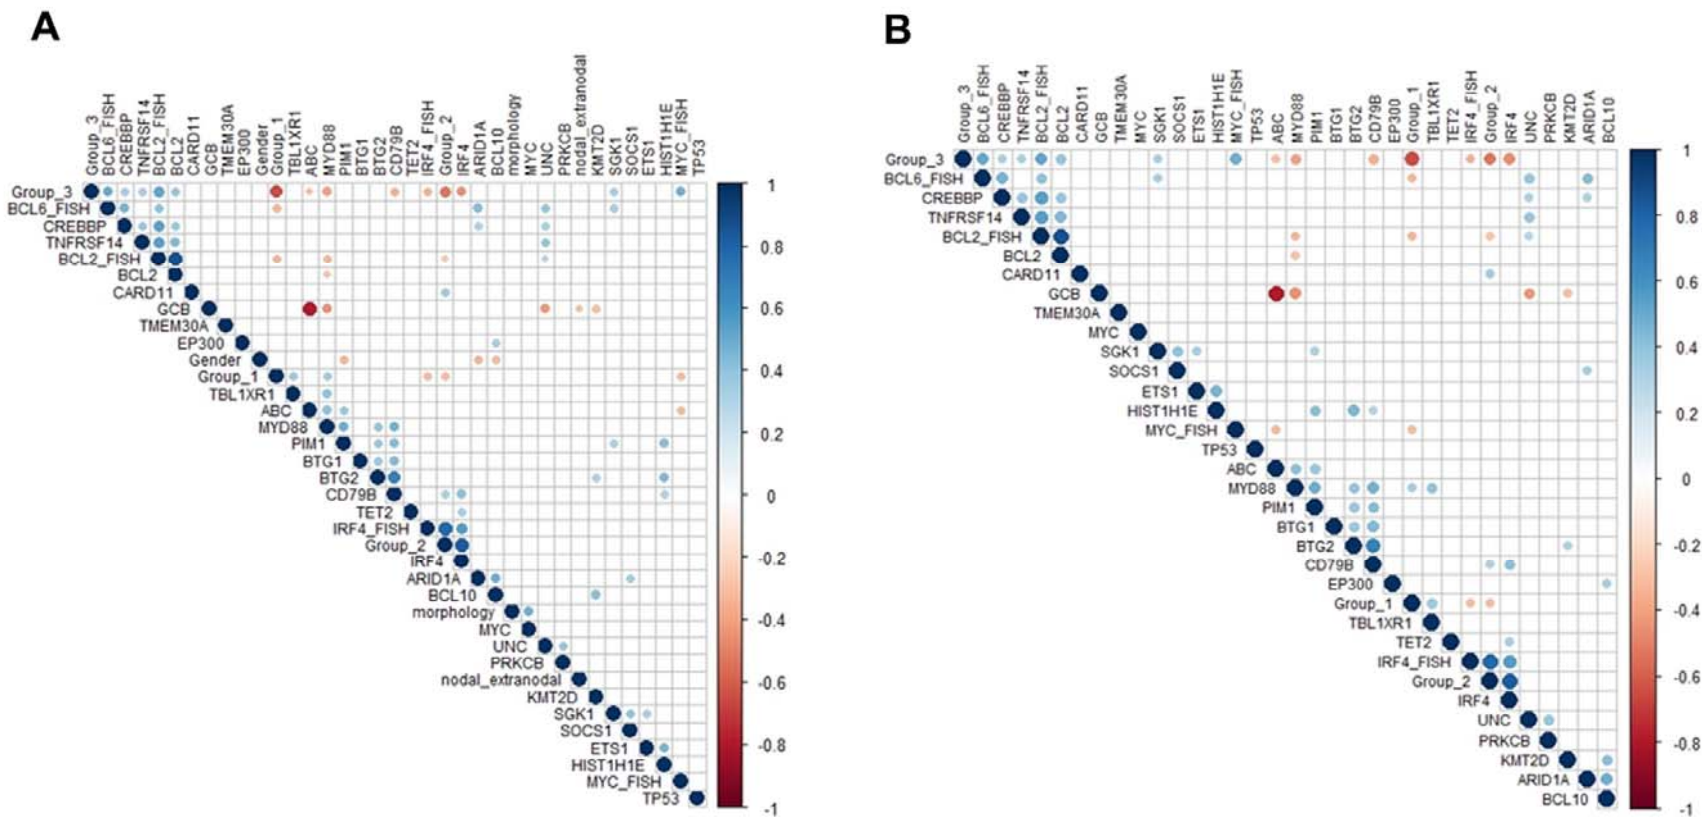

## References

1. Ahmed S, Glover P, Taylor J, et al. Comparative analysis of gene expression platforms for cell-of-origin classification of diffuse large B-cell lymphoma shows high concordance. *Br. J. Haematol.* 2021;192(3):599–604.
2. Li H, Durbin R. Fast and accurate short read alignment with Burrows-Wheeler transform. *Bioinforma. Oxf. Engl.* 2009;25(14):1754–1760.
3. McKenna A, Hanna M, Banks E, et al. The Genome Analysis Toolkit: a MapReduce framework for analyzing next-generation DNA sequencing data. *Genome Res.* 2010;20(9):1297–1303.
4. Wang K, Li M, Hakonarson H. ANNOVAR: functional annotation of genetic variants from high-throughput sequencing data. *Nucleic Acids Res.* 2010;38(16):e164.
5. Nann D, Ramis-Zaldivar JE, Müller I, et al. Follicular lymphoma t(14;18)-negative is genetically a heterogeneous disease. *Blood Adv.* 2020;4(22):5652–5665.
6. Karube K, Enjuanes A, Dlouhy I, et al. Integrating genomic alterations in diffuse large B-cell lymphoma identifies new relevant pathways and potential therapeutic targets. *Leukemia.* 2018;32(3):675–684.
7. Reva B, Antipin Y, Sander C. Predicting the functional impact of protein mutations: application to cancer genomics. *Nucleic Acids Res.* 2011;39(17):e118.
8. Kumar P, Henikoff S, Ng PC. Predicting the effects of coding non-synonymous variants on protein function using the SIFT algorithm. *Nat. Protoc.* 2009;4(7):1073–1081.
